# Supplementary material for: Re-evaluating Scythian lifeways: Isotopic analysis of diet and mobility in Iron Age Ukraine
Source: PubMed Central journal article supplement (PMC7946291; doi:10.1371/journal.pone.0245996), 2021-03-10
Supplement: pone.0245996.s001.pdf [file pone.0245996.s001.pdf]

# Re-evaluating Scythian lifeways: Isotopic analysis of diet and mobility in Iron Age Ukraine

A. R. Ventresca Miller<sup>1,2,3,4\*</sup>, J. Johnson<sup>5</sup>, S. Makhortykh<sup>6</sup>, C. Gerling<sup>7</sup>, L. Litvinova<sup>6</sup>, S. Andrukh<sup>8</sup>, G. Toshev<sup>8</sup>, J. Zech<sup>1</sup>, P. le Roux<sup>9</sup>, C. Makarewicz<sup>3,4</sup>, N. Boivin<sup>1,10,11,12</sup>, P. Roberts<sup>1,10</sup>

\*Corresponding author, [ventrescamiller@shh.mpg.de](mailto:ventrescamiller@shh.mpg.de), [avenmil@umich.edu](mailto:avenmil@umich.edu)

<sup>1</sup> Max Planck Institute for the Science of Human History, Department of Archaeology, Stable Isotope Group, Kahlaische Strasse 10, 07745 Jena, Germany

<sup>2</sup> Department of Anthropology and Museum of Anthropological Archaeology, University of Michigan, Ann Arbor 48109, Michigan, United States

<sup>3</sup> Graduate School of Human Development in Landscapes, Kiel University, Leibnizstrasse 3, 24118 Kiel, Germany

<sup>4</sup> Institute for Prehistoric and Protohistoric Archaeology, Kiel University, Johanna-Mestorf-Strasse 2-6, 24118 Kiel, Germany

<sup>5</sup> Department of Anthropology, University of Wyoming, 12<sup>th</sup> and Lewis Streets, Laramie, Wyoming 82070, United States

<sup>6</sup> Institute of Archaeology of National Academy of Sciences Ukraine (NUAS), 12 av. Geroyiv Stalingrada, 04210 Kyiv, Ukraine

<sup>7</sup> Integrative Prehistory and Archaeological Science, Department of Environmental Sciences, University of Basel, Spalenring 145, 4055 Basel, Switzerland

<sup>8</sup> Zaporizhzhya National University, Soborniy Avenue 74, 69002 Zaporizhzhya, Ukraine

<sup>9</sup> Department of Geological Sciences, University of Cape Town, Rondebosch, 7700, South Africa

<sup>10</sup> School of Social Science, University of Queensland, Brisbane, Australia

<sup>11</sup> Department of Archaeology, University of Calgary, Calgary, Canada

<sup>12</sup> Smithsonian Institution, New York, USA

## Radiocarbon dating

We sampled four human bones for radiocarbon dating, which were run at the Poznan Radiocarbon Laboratory (S5 Table). Collagen degradation in bone was checked by measuring the content of nitrogen and carbon in bone, using analyser Flash EA 1112 Series (ThermoScientific), with suitable samples having nitrogen in bone above 0.6%, and C/N ratio not higher than 5. Bones were crushed mechanically, and powder was treated with 2M HCl at room temperature for 20 minutes, then with 0.1M NaOH for one hour. After each step of treatment, the sample was centrifuged, and residuum was collected. Extraction of collagen is processed in HCl (pH=3, 80°C, 10h), and after centrifugation, residuum was removed. Extracted collagen was then ultrafiltered on pre-cleaned Vivaspin 15 MWCO 30 kD filters [1]. Quality of the collagen is ultimately assessed basing on C/N atomic ratio (interval of acceptance: 2.7-3.5) and collagen extraction yield (acceptance threshold:

0.5%). Content of  $^{14}\text{C}$  in a sample of carbon is measured using the spectrometer "Compact Carbon AMS" (produced by: National Electrostatics Corporation, USA) as described [2]. The measurement is performed by comparing intensities of ionic beams of  $^{14}\text{C}$ ,  $^{13}\text{C}$  and  $^{12}\text{C}$  measured for each sample and for standard samples (modern standard: "Oxalic Acid II" and standard of  $^{14}\text{C}$ -free carbon: "background"). In each AMS run, 30-33 samples of unknown age are measured, alternated with measurements of 3-4 samples of modern standard and 1-2 samples of background.

The site of Mamai-Gora was previously dated from the end of the 5th to the 2<sup>nd</sup> century BCE based on detailed analyses of material culture from burials [3–5]. Similarly, analyses of material culture from Medvin allows for the separation of burials into two chronological groups, which date from the 7<sup>th</sup> to 6<sup>th</sup> centuries BC, and from the 5<sup>th</sup> to 4<sup>th</sup> centuries BCE [6–8]. Our current radiocarbon dating of human occipital bones (kurgan 125, grave 1; kurgan 128, grave 1) from Mamai-Gora gave conventional radiocarbon ages of  $2265 \pm 30$  BP (Poz-93203) and  $2195 \pm 35$  BP (Poz-93205). Calibrated date ranges (IntCal13) are from 399-209 cal BC and 369-174 cal BCE (OxCal ver 4.2.3) [9,10]. Recently published radiocarbon dates from burials at Medvin [11] support these findings with conventional radiocarbon ages of  $2455 \pm 30$  BP (kurgan 6, Grave 1, 1) and  $2500 \pm 30$  BP; calibrated date ranges (IntCat13) from 756-413 cal BC and 788-537 cal BC, respectively. At Medvin we radiocarbon dated a human occipital (kurgan 8, grave 1) and a human sacrum (kurgan 6, grave 1) that had conventional radiocarbon ages of  $2480 \pm 35$  BP (Poz-9320) and  $2320 \pm 35$  BP (Poz-93202), with calibrated date ranges from 775-431 cal BCE and 484-233 cal BCE. Slightly earlier radiocarbon dates are not unexpected, as other dating programs have similarly pushed relative dates back several hundred years [12,13].

## **Modern environmental and isotopic landscapes for carbon and oxygen isotope data**

The climate across Ukraine is continental with moderately cold winters and comparatively warm summers. Medvin (182 masl) is located along a small tributary of the Ros' river, within the broader watershed and floodplain of this larger river system, in the Kyiv'ska region where temperatures range from  $-6^\circ\text{C}$  in the winter to  $26^\circ\text{C}$  in the summer. Mamai-Gora (57 masl) is located in the Zaporizhia region with temperatures in the summer reaching  $22^\circ\text{C}$  and as low as  $-3^\circ\text{C}$  in the winter. The site is situated along the southern (left) bank of the Dnieper River that is designated as part of the Dnieper lowlands, an extended valley within a system of floodplains [14]. The Dnieper originates in the Smolensk region of Russia and eventually flows into the Black Sea, with tens of thousands of tributaries feeding the river along the way. Currently, the Dnieper River has multiple dams that have altered its formerly wide floodplain. This navigable waterway is an important transport route today as it likely was in prehistory [15,16].

In central Ukraine, there is a high degree of seasonal variation in  $\delta^{18}\text{O}$  values of precipitation [17]. There are very few water stations in Ukraine. We focused on three that were located in the northeast at Kharkiv, in the east at Svyatohirs'k, and far to the west at L'viv. At the Karkhiv water station (152 masl) the average  $\delta^{18}\text{O}$  value of meteoric water is  $-7.4\text{‰}$ , with values ranging from a seasonal low of  $-12.4\text{‰}$  in March to a high in July of  $-4.2\text{‰}$  [17]. The average temperature ranges from  $-6.9$  to  $19^\circ\text{C}$ . The Svyatohirs'k station (163 masl) recorded an average  $\delta^{18}\text{O}$  value for meteoric water of  $-9.2\text{‰}$ , with values ranging from a low of  $-13.2\text{‰}$  in January to  $-5.5\text{‰}$  in July. At the L'viv station (296 masl) values vary in  $\delta^{18}\text{O}$  from  $-14.9\text{‰}$  in February to  $-7.6\text{‰}$  in August,

with temperatures ranging from  $-3.5$  to  $17.7^{\circ}\text{C}$  respectively. Only a single locale has published surface water  $\delta^{18}\text{O}$  values, which are from the Seversky Donets River near Kharkiv and range from  $-6.2$  to  $-11.7\text{‰}$  from May and September, respectively. Nearby, groundwater  $\delta^{18}\text{O}$  values range from  $-10.1$  to  $-12.5\text{‰}$  for the same period [18,19].

The direct comparison of ancient  $\delta^{18}\text{O}_{\text{dw(VSMOW)}}$  values and modern precipitation values is not recommended as the transformation of human  $\delta^{18}\text{O}_{\text{c(VPDB)}}$  to drinking water values  $\delta^{18}\text{O}_{\text{dw(VSMOW)}}$  include large error ranges of up to  $3.5\text{‰}$  [20–22]. Furthermore, the extent of environmental change is unknown for many regions, leading to inaccurate interpretations of mobility. Therefore, we have not transformed human  $\delta^{18}\text{O}_{\text{c(VPDB)}}$  to drinking water values  $\delta^{18}\text{O}_{\text{dw(VSMOW)}}$  instead comparing a range of values for each site. At a single locale, the range of variation in human  $\delta^{18}\text{O}$  values has been determined as  $0.5$  to  $3.0\text{‰}$  [23–26]. Seasonal variation in stable oxygen isotope measurements of precipitation for the region, based on modern measured values, is extensive at *c.*  $8.0\text{‰}$ , suggesting that in strongly seasonal environments we might expect a wider range of human  $\delta^{18}\text{O}$  values for individuals who resided in a single locale during tissue formation. Accounting for strong seasonal variation, we calculated the local range for individuals drinking from the same water source as the median value  $\pm 1.5\text{‰}$  [26].

We investigated the stable carbon isotope measurements of terrestrial vegetation in the vicinity of the sites of Medvin and Mamai-Gora to inform the dietary intake of Scythian era populations. Modern environmental zones are on a north-south gradient shifting from mixed forests, to forest-steppe, to open steppe vegetation in the south, with the Black Sea littoral along the southern border (Fig 1). The site of Medvin is located in central Ukraine within the forest-steppe zone ( $49^{\circ}24'26.9''\text{N}$   $30^{\circ}50'45.0''\text{E}$ ). This region is characterized by deciduous woodlands interspersed with meadow steppe, while to the north there are mixed coniferous and deciduous forests [27,28]. Heading south, the forests gradually decrease in density and open steppe predominates. Mamai-Gora ( $47^{\circ}26'07.7''\text{N}$   $34^{\circ}16'31.1''\text{E}$ ) is located just south of the Dnieper River in the open steppe. Central and southern Ukraine consists of highland and lowland plains, with floral biomes supporting mainly  $\text{C}_3$  vegetation. Terrestrial plants using a  $\text{C}_3$  pathway exhibit average  $\delta^{13}\text{C}$  values of  $-27\text{‰}$ , while those following a  $\text{C}_4$  pathway have higher average  $\delta^{13}\text{C}$  values of  $-14\text{‰}$  [29].

To clarify human enamel apatite  $\delta^{13}\text{C}$  values, we determined the best offset between enamel apatite and diet, which varies by taxa and by tissue type. The offset between diet and apatite is  $\sim 14.0\text{‰}$  for herbivore bone carbonate and  $\sim 9.5\text{‰}$  for carnivore bone carbonate [30–33]. For human enamel apatite, an offset of  $\sim 9.0\text{‰}$  has been suggested to be appropriate [31,34–36]. We use the following equation from Ambrose and Norr (1993):  $\delta^{13}\text{C}_{\text{diet}} = 1.04 * \delta^{13}\text{C}_{\text{apatite}} - 9.2$  for all humans in this study. Average herbivore  $\delta^{13}\text{C}$  values (of enamel) for 100%  $\text{C}_3$  and  $\text{C}_4$  reliance in pre-industrial  $\text{CO}_2$  conditions are approximately  $-12.0\text{‰}$  and  $0.0\text{‰}$ , respectively [37,38]. Tooth enamel isotope values of humans with a 100% reliance on  $\text{C}_3$  plants are estimated at  $-13.0$  and  $-17.0\text{‰}$ , while humans with a high reliance on  $\text{C}_4$  plants are estimated at  $-5.0$  to  $-1.0\text{‰}$  [30], however, it should be borne in mind that a lack of experimental work means these values are poorly defined for humans.

## **Faunal and plant isotope references to understand human diet**

The carbon isotopic values for animals at Bel'sk range from  $-19.8$  to  $-16.3\text{‰}$ , indicating a mixed diet of both  $\text{C}_3$  and  $\text{C}_4$  plants, therefore, it is possible that livestock at Bel'sk ingested small to

moderate amounts of C<sub>4</sub> plants such as millet that were being farmed in the vicinity of the site. The observed range of  $\delta^{13}\text{C}$  for humans at Medvin (−16.8 to −13.1‰), Mamai-Gora (−17.7 to −14.9‰) and Bel'sk (−17.6 to −12.8‰) only overlap slightly with the faunal values, with the majority exceeding them more than the expected 1‰ trophic increase. The average faunal  $\delta^{13}\text{C}$  values of −18.6‰, were 3.1‰ lower than the average human values of Bel'sk (−15.5‰). This suggests that the dietary intake of humans relied partially on livestock and C<sub>3</sub> plants, alongside C<sub>4</sub> food sources such as millet. Measurements of modern millets (in controlled environments and across Eurasia) produce a range of  $\delta^{13}\text{C}$  values from −10.0 to −14.1‰ and  $\delta^{15}\text{N}$  values that range from 1.8 to 7.8‰ [39–42]. Assuming a diet-consumer enrichment of 3–5‰, the range of human collagen  $\delta^{15}\text{N}$  values for humans (9.6 to 14.6‰) fits well within the adjusted range of values (+3–5‰) for both modern millets (4.8 to 12.8‰) and ancient herbivores from Bel'sk (10.8 to 14.3‰). When plotted together,  $\delta^{13}\text{C}$  and  $\delta^{15}\text{N}$  measurements of bone collagen suggest that millet was an important part of dietary intake in the Scythian era. In addition, slightly higher  $\delta^{15}\text{N}$  values at the site of Mamai-Gora might indicate that fish were a dietary component.

We identified a similar pattern in the carbon and nitrogen isotopic composition of humans and livestock from the Pontic steppe as was previously discussed in Ventresca Miller and Makarewicz [43] for much of Central and Inner Asia. At Bel'sk there is a positive correlation between  $\delta^{13}\text{C}$  and  $\delta^{15}\text{N}$  values for livestock, but a breakdown in this correlation for humans, suggesting a departure from Pontic steppe dietomes. Livestock with a positive correlation between  $\delta^{13}\text{C}$  and  $\delta^{15}\text{N}$  values could have ingested small amounts of naturally available C<sub>4</sub> plants or arid impacted C<sub>3</sub> vegetation, rather than feeding on fallow fields. At the sites of Bel'sk, Medvin and Mamai-Gora there was a shift in the average  $\delta^{13}\text{C}$  values relative to reference livestock. Pastoral societies (lacking domesticated grains) have isotopic data that demonstrate a shared carbon isospace between humans and livestock, from the same region and time period [43]. As humans and fauna at the Iron Age sites under study share very little carbon isospace, their dietary intake included a partial reliance on foodstuffs atypical for Pontic steppe floral biomes, such as domesticated millet.

## References

1. Bronk Ramsey C, Higham T, Bowles A, Hedges R. Improvements to the pretreatment of bone at Oxford. *Radiocarbon*. 2004;46: 155–163.
2. Goslar T, Czernik J, Goslar E. Low-energy 14C AMS in Poznań radiocarbon laboratory, Poland. *Nuclear instruments and methods in physics research section B: Beam Interactions with Materials and Atoms*. 2004;223: 5–11.
3. Andrukh SI. Mamai-Gora cemetery. Zaporizhia: Zaporizhzhya National University; 2001.
4. Andrukh SI, Toshev GN. Mamai-Gora cemetery. Zaporizhia: Zaporizhzhya National University; 1999.
5. Andrukh SI, Toshev GN. Mamai-Gora burial ground of the Scythian time. In: Wojciech B, editor. *Peregrinationes archaeologicae in Asia et Europa Joanni Chochorowski dedicatae*, Wydawnictwo Profil-Archeo. Krakow; 2012. pp. 485–490.
6. Kovpanenko GT. The kurgans of the Scythian time near Medvin in Ross-river basin. *Scythians and Sarmatians*. Kyiv; 1977. pp. 40–72.

7. Levchenko BM. The excavaton of the first kurgan group near Medvin-village in the Boguslav region (by the materials of excavations 1982, 1984—1985). In: Grechko DS, Shelekhan AB, editors. Grishkovsky cemetery of the Scythians in Kharkov region. Kyiv; 2012. pp. 109–139.
8. Levchenko BM, Levchenko NB, Grechko DS. The barrows of the early Scythian time near Medvin in Ross-river basin (by the materials of excavations 1984—1985). *Archaeology and ancient history of Ukraine*. 2015;2: 202–218.
9. Bronk Ramsey C. Methods for Summarizing Radiocarbon Datasets. *Radiocarbon*. 2017; 1–25.
10. Reimer PJ, Bard E, Bayliss A, Beck JW, Blackwell PG, Ramsey CB, et al. IntCal13 and Marine13 radiocarbon age calibration curves 0–50,000 years cal BP. *Radiocarbon*. 2013;55: 1869–1887.
11. Järve M, Saag L, Scheib CL, Pathak AK, Montinaro F, Pagani L, et al. Shifts in the Genetic Landscape of the Western Eurasian Steppe Associated with the Beginning and End of the Scythian Dominance. *Current Biology*. 2019;29: 2430–2441. e10.
12. Hanks BK, Epimakhov A, Renfrew A. Towards a refined chronology for the Bronze Age of the southern Urals, Russia. *Antiquity*. 2007;81: 353–367.
13. Beisenov AZ, Svyatko SV, Kassenalin AE, Zhambulatov KA, Duisenbai D, Reimer PJ. First radiocarbon chronology for the Early Iron Age sites of Central Kazakhstan (Tasmola culture and Korgantas period). *Radiocarbon*. 2016;58: 179–191.
14. Физико-географическое районирование Украинской ССР. Киев: Киевский университет; 1968.
15. Dewdney JC. *A Geography of the Soviet Union: Pergamon Oxford Geographies*. Elsevier; 2013.
16. Samoilenko Y. The principle of freedom of international river navigation and problems of regime of navigational usage of international rivers, which flow through the territory of Ukrainian State. Proceedings of Ukrainian scientific and practical conference “Actual problems of contemporary international law”(Sevastopol, Ukraine, 21-23 June 2012). 2012.
17. IAEA/WMO. In: Global network of isotopes in precipitation, The GNIP Database [Internet]. Available: <http://www.iaea.org/water>
18. Vystavna Y, Diadin D, Huneau F. Describing stable water isotopes framework for the surface water, groundwater and precipitation in East Ukraine. 7th International Conference on Water Resources and Environment Research, Kyoto TERRSA, Kyoto. 2016. pp. 5–9.
19. Vystavna Y, Diadin D, Huneau F. Defining a stable water isotope framework for isotope hydrology application in a large trans-boundary watershed (Russian Federation/Ukraine).

Isotopes in Environmental and Health Studies. 2018;54: 147–167.  
doi:10.1080/10256016.2017.1346635

20. Pollard AM, Pellegrini M, Lee-Thorp JA. Some observations on the conversion of dental enamel  $\delta^{18}\text{O}_\text{p}$  values to  $\delta^{18}\text{O}_\text{w}$  to determine human mobility. *American Journal of Physical Anthropology*. 2011;145: 499–504.
21. Pryor AJ, Stevens RE, O’Connell TC, Lister JR. Quantification and propagation of errors when converting vertebrate biomineral oxygen isotope data to temperature for palaeoclimate reconstruction. *Palaeogeography, Palaeoclimatology, Palaeoecology*. 2014;412: 99–107.
22. Ventresca Miller AR. Modeling modern surface water  $\delta^{18}\text{O}$  to explore prehistoric human mobility. In: Ventresca Miller, Makarewicz CA, editors. *Isotopic Investigations of Pastoralism in Prehistory*. New York: Routledge; 2018. pp. 41–56.
23. White C, Longstaffe FJ, Law KR. Exploring the effects of environment, physiology and diet on oxygen isotope ratios in ancient Nubian bones and teeth. *Journal of Archaeological Science*. 2004;31: 233–250.
24. Ehleringer JR, Bowen GJ, Chesson LA, West AG, Podlesak DW, Cerling TE. Hydrogen and oxygen isotope ratios in human hair are related to geography. *Proceedings of the National Academy of Sciences*. 2008;105: 2788–2793.
25. Daux V, Lécuyer C, Héran M-A, Amiot R, Simon L, Fourel F, et al. Oxygen isotope fractionation between human phosphate and water revisited. *Journal of human evolution*. 2008;55: 1138–1147.
26. Lightfoot E, O’Connell TC. On the use of biomineral oxygen isotope data to identify human migrants in the archaeological record: intra-sample variation, statistical methods and geographical considerations. *PloS one*. 2016;11: 0153850.
27. Dolukhainov PM. Geography of East European Plain. In: Dolukhainov PM, Sarson GR, Shukurov AM, editors. *The East European plain on the eve of agriculture*. Archaeopress; 2009. pp. 9–15.
28. Sorokina L, Doroshkevich S, Kushnir A. Ancient and modern landscapes of Bels’k settlement as a human habitats. *Ukrainian Geographical Magazine*. 2014;3: 25–33.
29. O’Leary MH. Carbon isotope fractionation in plants. *Phytochemistry*. 1981;20: 553–567.
30. Krueger HW, Sullivan CH. Models for Carbon Isotope Fractionation Between Diet and Bone. *Stable Isotopes in Nutrition*. American Chemical Society; 1984. pp. 205–220.  
doi:10.1021/bk-1984-0258.ch014
31. Ambrose SH, Norr L. Experimental evidence for the relationship of the carbon isotope ratios of whole diet and dietary protein to those of bone collagen and carbonate. *Prehistoric human bone*. Springer; 1993. pp. 1–37.

32. Koch PL, Fogel ML, Tuross N. Tracing the diets of fossil animals using stable isotopes. In: Lajtha K, Michener B, editors. *Stable Isotopes in Ecology and Environmental Science*. Boston: Blackwell Scientific Publication; 1994. pp. 63–92.
33. Cerling TE, Harris JM. Carbon isotope fractionation between diet and bioapatite in ungulate mammals and implications for ecological and paleoecological studies. *Oecologia*. 1999;120: 347–363.
34. Ambrose SH, Butler BM, Hanson DB, Hunter-Anderson RL, Krueger HW. Stable isotopic analysis of human diet in the Marianas Archipelago, Western Pacific. *American Journal of Physical Anthropology*. 1997;104: 343–361. doi:10.1002/(SICI)1096-8644(199711)104:3<343::AID-AJPA5>3.0.CO;2-W
35. Krigbaum J. Neolithic subsistence patterns in northern Borneo reconstructed with stable carbon isotopes of enamel. *Journal of Anthropological Archaeology*. 2003;22: 292–304. doi:10.1016/S0278-4165(03)00041-2
36. Kellner CM, Schoeninger MJ. A simple carbon isotope model for reconstructing prehistoric human diet. *American Journal of Physical Anthropology*. 2007;133: 1112–1127.
37. Lee-Thorp JA, Sealy JC, Van Der Merwe NJ. Stable carbon isotope ratio differences between bone collagen and bone apatite, and their relationship to diet. *Journal of archaeological science*. 1989;16: 585–599.
38. Levin NE, Simpson SW, Quade J, Cerling TE, Frost SR. Herbivore enamel carbon isotopic composition and the environmental context of *Ardipithecus* at Gona, Ethiopia. *Geol Soc Am Spec Pap*. 2008;446: 215–234.
39. McGovern PE, Zhang J, Tang J, Zhang Z, Hall GR, Moreau RA, et al. Fermented beverages of pre-and proto-historic China. *Proceedings of the National Academy of Sciences*. 2004;101: 17593–17598.
40. Pechenkina EA, Ambrose SH, Xiaolin M, Benfer RA. Reconstructing northern Chinese Neolithic subsistence practices by isotopic analysis. *Journal of Archaeological Science*. 2005;32: 1176–1189.
41. Hu Y, Wang S, Luan F, Wang C, Richards MP. Stable isotope analysis of humans from Xiaojingshan site: implications for understanding the origin of millet agriculture in China. *Journal of Archaeological Science*. 2008;35: 2960–2965. doi:10.1016/j.jas.2008.06.002
42. Lightfoot E, Przelomska N, Craven M, O'Connell TC, He L, Hunt HV, et al. Intraspecific carbon and nitrogen isotopic variability in foxtail millet (*Setaria italica*): Carbon and nitrogen isotopic variability in foxtail millet. *Rapid Commun Mass Spectrom*. 2016;30: 1475–1487. doi:10.1002/rcm.7583
43. Ventresca Miller A, Makarewicz CA. Intensification in pastoralist cereal use coincides with the expansion of trans-regional networks in the Eurasian Steppe. *Sci Rep*. 2019; 8363.

| Sample Number  | Individual Number | Cemetery | Grave         | Individual | # of paired teeth | Sex      | Age Range   | <sup>87/86</sup> Sr (M1) | <sup>87/86</sup> Sr (M2) | <sup>87/86</sup> Sr (M3) | Sr difference between paired teeth | δ <sup>18</sup> O <sub>(C)</sub> (VDPB) (M1) | δ <sup>18</sup> O <sub>(C)</sub> (VDPB) (M2) | δ <sup>18</sup> O <sub>(C)</sub> (VDPB) (M3) | δ <sup>18</sup> O difference between paired teeth | δ <sup>13</sup> C <sub>(C)</sub> (VDPB) (M1) | δ <sup>13</sup> C <sub>(C)</sub> (VDPB) (M2) | δ <sup>13</sup> C <sub>(C)</sub> (VDPB) (M3) | δ <sup>13</sup> C difference between paired teeth | δ <sup>15</sup> N (collagen) | δ <sup>13</sup> C (collagen) |
|----------------|-------------------|----------|---------------|------------|-------------------|----------|-------------|--------------------------|--------------------------|--------------------------|------------------------------------|----------------------------------------------|----------------------------------------------|----------------------------------------------|---------------------------------------------------|----------------------------------------------|----------------------------------------------|----------------------------------------------|---------------------------------------------------|------------------------------|------------------------------|
| 223            | 23                | Medvin   | K 8, Grave 1  | 1 of 1     | –                 | Female   | > 40 yrs    |                          | –                        | 0.7108                   | –                                  | –                                            | –                                            | –                                            | –                                                 | –                                            | –                                            | –                                            | –                                                 | 10.6                         | -13.9                        |
| 225, 226       | 24                | Medvin   | K-13, grave 1 | 1 of 1     | 2                 | Male     | > 50 yrs    | 0.7107                   | –                        | 0.7109                   | 0.0002                             | –                                            | –                                            | –                                            | –                                                 | –                                            | –                                            | –                                            | –                                                 | –                            | –                            |
| 228, 229       | 25                | Medvin   | K 6, Grave 1  | 1 of 1     | 2                 | Male     | 40 - 50 yrs | 0.7106                   | –                        | 0.7106                   | 0.0001                             | -5.7                                         | –                                            | -6.4                                         | 0.8                                               | -6.7                                         | –                                            | -4.1                                         | 2.6                                               | 10.8                         | -13.1                        |
| 231, 232       | 26                | Medvin   | K 9, Grave 1  | 1 of 3     | 2                 | Male     | 24 - 35 yrs | 0.7110                   | –                        | 0.7108                   | 0.0001                             | -5.7                                         | –                                            | -6.7                                         | 1.0                                               | -7.3                                         | –                                            | -9.1                                         | 1.8                                               | 9.7                          | -14.9                        |
| 234, 235       | 27                | Medvin   | K 9, Grave 1  | 2 of 3     | 2                 | Indet.   | 35 - 40 yrs | 0.7111                   | –                        | 0.7108                   | 0.0003                             | -5.2                                         | –                                            | -5.8                                         | 0.6                                               | -7.0                                         | –                                            | -9.8                                         | 2.8                                               | 10.3                         | -16.8                        |
| 237, 238       | 28                | Medvin   | K 9, Grave 1, | 3 of 3     | 2                 | Indet.   | 30 - 35 yrs | 0.7106                   | –                        | 0.7107                   | 0.0000                             | -6.3                                         | –                                            | -6.6                                         | 0.3                                               | -8.0                                         | –                                            | -6.8                                         | 1.2                                               | 9.6                          | -15.7                        |
| 240, 241       | 29                | Medvin   | K 1, Grave 1  | 1 of 1     | 2                 | Male     | > 30 yrs    | 0.7108                   | 0.7106                   | –                        | 0.0002                             | -4.9                                         | -7.4                                         | –                                            | 2.6                                               | -7.1                                         | -3.4                                         | –                                            | 3.8                                               | 11.0                         | -13.7                        |
| 242            | –                 | Medvin   | K 22, Grave 1 | 2 of 6     | –                 | Male     | > 45 yrs    | –                        | –                        | –                        | –                                  | –                                            | –                                            | –                                            | –                                                 | –                                            | –                                            | –                                            | –                                                 | 10.9                         | -15.6                        |
| 243            | –                 | Medvin   | K 22, Grave 1 | 1 of 6     | –                 | Male     | > 55 yrs    | –                        | –                        | –                        | –                                  | –                                            | –                                            | –                                            | –                                                 | –                                            | –                                            | –                                            | –                                                 | 10.1                         | -14.6                        |
| 246            | 30                | Medvin   | K 22, Grave 1 | 4 of 6     | –                 | Subadult | 6 - 10 yrs  | 0.7108                   | –                        | –                        | –                                  | -5.3                                         | –                                            | –                                            | –                                                 | -8.7                                         | –                                            | –                                            | –                                                 | 10.0                         | -15.3                        |
| 248            | 31                | Medvin   | K 22, Grave 1 | 3 of 6     | –                 | Subadult | 4 -8 yrs    | 0.7108                   | –                        | –                        | –                                  | -6.0                                         | –                                            | –                                            | –                                                 | -6.7                                         | –                                            | –                                            | –                                                 | 10.4                         | -15.0                        |
| <b>Average</b> |                   |          |               |            |                   |          |             | 0.7108                   | 0.7106                   | 0.7108                   | <b>0.0002</b>                      | -5.6                                         | -7.4                                         | -6.4                                         | <b>1.0</b>                                        | -7.4                                         | -3.4                                         | -7.4                                         | <b>2.4</b>                                        | 10.3                         | -14.9                        |

S1a Table. Isotope values for individuals from the site of Medvin (ME)



| Sample Number  | Individual Number | Cemetery   | Grave           | Individual | # of paired teeth | Sex      | Age Range     | <sup>87/86</sup> Sr (M1) | <sup>87/86</sup> Sr (M2) | <sup>87/86</sup> Sr (M3) | Sr difference between paired teeth | δ <sup>18</sup> O <sub>(C)</sub> (VDPB) (M1) | δ <sup>18</sup> O <sub>(C)</sub> (VDPB) (M2) | δ <sup>18</sup> O <sub>(C)</sub> (VDPB) (M3) | δ <sup>18</sup> O difference between paired teeth | δ <sup>13</sup> C <sub>(C)</sub> (VDPB) (M1) | δ <sup>13</sup> C <sub>(C)</sub> (VDPB) (M2) | δ <sup>13</sup> C <sub>(C)</sub> (VDPB) (M3) | δ <sup>13</sup> C difference between paired teeth | δ <sup>15</sup> N (collagen) | δ <sup>13</sup> C (collagen) |
|----------------|-------------------|------------|-----------------|------------|-------------------|----------|---------------|--------------------------|--------------------------|--------------------------|------------------------------------|----------------------------------------------|----------------------------------------------|----------------------------------------------|---------------------------------------------------|----------------------------------------------|----------------------------------------------|----------------------------------------------|---------------------------------------------------|------------------------------|------------------------------|
| 174, 176       | 32                | Mamai-Gora | K. 110, Grave 2 | 1 of 1     | 2                 | Male     | 17 - 40 yrs   | 0.7099                   | -                        | 0.7100                   | 0.0000                             | -5.0                                         | -                                            | -7.2                                         | 2.2                                               | -11.7                                        | -                                            | -11.0                                        | 0.7                                               | 12.5                         | -16.3                        |
| 183            | -                 | Mamai-Gora | K. 125          | 1 of 1     | -                 | Male     | 28 - 55 yrs   | -                        | -                        | -                        | -                                  | -                                            | -                                            | -                                            | -                                                 | -                                            | -                                            | -                                            | -                                                 | 12.5                         | -16.3                        |
| 185, 186       | 33                | Mamai-Gora | K. 114, Grave 3 | 1 of 1     | 2                 | Male     | 20 - 35 yrs   | 0.7098                   | -                        | 0.7099                   | 0.0001                             | -5.9                                         | -                                            | -6.6                                         | 0.6                                               | -12.0                                        | -                                            | -7.4                                         | 4.6                                               | 11.2                         | -15.5                        |
| 188, 189       | 34                | Mamai-Gora | K. 106, Grave 1 | 1 of 1     | 2                 | Male     | 40 - 50 yrs   | 0.7098                   | 0.7098                   | -                        | 0.0001                             | -7.1                                         | -5.0                                         | -                                            | 2.0                                               | -8.1                                         | -10.7                                        | -                                            | 2.6                                               | -                            | -                            |
| 191, 192       | 35                | Mamai-Gora | K. 109, Grave 2 | 1 of 1     | 2                 | Female   | 30 - 45 yrs   | 0.7102                   | 0.7099                   | -                        | 0.0004                             | -3.9                                         | -5.7                                         | -                                            | 1.8                                               | -11.0                                        | -6.7                                         | -                                            | 4.3                                               | 12.7                         | -16.5                        |
| 194, 195       | 36                | Mamai-Gora | K. 103, Grave 1 | 1 of 1     | 2                 | Female   | 24 - 30 yrs   | 0.7099                   | -                        | 0.7099                   | 0.0000                             | -5.0                                         | -                                            | -6.1                                         | 1.2                                               | -9.0                                         | -                                            | -9.5                                         | 0.5                                               | 12.0                         | -17.7                        |
| 197, 198       | 37                | Mamai-Gora | K. 160, Grave 1 | 1 of 2     | 2                 | Subadult | 3.5 - 6.5 yrs | 0.7100                   | -                        | -                        | -                                  | -5.6                                         | -5.3                                         | -                                            | 0.3                                               | -8.6                                         | -10.2                                        | -                                            | 1.6                                               | 14.6                         | -14.9                        |
| 200, 201       | 38                | Mamai-Gora | K. 160, Grave 1 | 2 of 2     | 2                 | Male     | 21 - 35 yrs   | 0.7091                   | -                        | 0.7104                   | 0.0013                             | -5.4                                         | -                                            | -6.2                                         | 0.8                                               | -10.1                                        | -                                            | -11.2                                        | 1.1                                               | 12.3                         | -17.4                        |
| 203, 204       | 39                | Mamai-Gora | K. 160, Grave 2 | 1 of 1     | 2                 | Female   | 15 - 23 yrs   | 0.7098                   | -                        | 0.7099                   | 0.0001                             | -5.8                                         | -                                            | -6.8                                         | 1.1                                               | -7.5                                         | -                                            | -8.7                                         | 1.2                                               | 11.5                         | -16.0                        |
| 206, 207       | 40                | Mamai-Gora | K. 63, Grave 1  | 1 of 1     | 2                 | Male     | >35 yrs       | 0.7100                   | 0.7100                   | -                        | 0.0000                             | -4.4                                         | -5.8                                         | -                                            | 1.4                                               | -7.3                                         | -11.1                                        | -                                            | 3.8                                               | 12.9                         | -15.8                        |
| 209, 210       | 41                | Mamai-Gora | K. 20, Grave 2  | 1 of 1     | 2                 | Male     | 30 - 40 yrs   | 0.7099                   | -                        | 0.7101                   | 0.0002                             | -5.4                                         | -                                            | -6.8                                         | 1.3                                               | -9.2                                         | -                                            | -10.9                                        | 1.8                                               | 11.1                         | -16.8                        |
| 211            | -                 | Mamai-Gora | K. 132, Grave 1 | 1 of 1     | -                 | Male     | 30 - 40 yrs   | -                        | -                        | -                        | -                                  | -                                            | -                                            | -                                            | -                                                 | -                                            | -                                            | -                                            | -                                                 | 11.7                         | -17.4                        |
| 213, 214       | 42                | Mamai-Gora | K. 128, Grave 1 | 1 of 1     | 2                 | Male     | 20 - 40 yrs   | 0.7099                   | -                        | 0.7101                   | 0.0002                             | -6.8                                         | -                                            | -5.6                                         | 1.2                                               | -12.2                                        | -                                            | -11.6                                        | 0.5                                               | 11.7                         | -17.5                        |
| 215            | -                 | Mamai-Gora | K. 153, Grave 1 | 1 of 1     | -                 | Male     | 40 - 50 yrs   | -                        | -                        | -                        | -                                  | -                                            | -                                            | -                                            | -                                                 | -                                            | -                                            | -                                            | -                                                 | 12.7                         | -16.8                        |
| 216, 217       | 43                | Mamai-Gora | K. 82, Grave 2  | 1 of 1     | 2                 | Female   | 35 - 45 yrs   | 0.7111                   | 0.7113                   | -                        | 0.0002                             | -6.1                                         | -6.0                                         | -                                            | 0.1                                               | -12.3                                        | -10.9                                        | -                                            | 1.4                                               | 11.5                         | -17.5                        |
| 220, 221       | 44                | Mamai-Gora | K. 58, Grave 2  | 1 of 1     | 2                 | Male     | 40 - 50 yrs   | 0.7100                   | -                        | 0.7099                   | 0.0000                             | -4.6                                         | -                                            | -5.7                                         | 1.0                                               | -9.8                                         | -                                            | -11.1                                        | 1.3                                               | 12.6                         | -16.7                        |
| <b>Average</b> |                   |            |                 |            |                   |          |               | <b>0.7100</b>            | <b>0.7102</b>            | <b>0.7100</b>            | <b>0.0002</b>                      | <b>-5.5</b>                                  | <b>-5.6</b>                                  | <b>-6.4</b>                                  | <b>1.2</b>                                        | <b>-9.9</b>                                  | <b>-9.9</b>                                  | <b>-10.2</b>                                 | <b>2.0</b>                                        | <b>12.2</b>                  | <b>-16.6</b>                 |

S1b Table. Human isotope values for the Iron Age site of Mamai-Gora (MG)

| Sample Number | Individual Number | Cemetery       | Grave                       | Sex      | Age Range           | $^{87/86}\text{Sr}$ (M1) | $^{87/86}\text{Sr}$ (M2) | $^{87/86}\text{Sr}$ (M3) | Sr difference between paired teeth | $\delta^{18}\text{O}_{\text{C}}$ -VDPB (M1) | $\delta^{18}\text{O}_{\text{C}}$ -VDPB (M2) | $\delta^{18}\text{O}_{\text{C}}$ -VDPB (M3) | $\delta^{18}\text{O}$ difference between paired teeth | $\delta^{13}\text{C}_{\text{C}}$ -VDPB (M1) | $\delta^{13}\text{C}_{\text{C}}$ -VDPB (M2) | $\delta^{13}\text{C}_{\text{C}}$ -VDPB (M3) | $\delta^{13}\text{C}$ difference between paired teeth | Reference    |
|---------------|-------------------|----------------|-----------------------------|----------|---------------------|--------------------------|--------------------------|--------------------------|------------------------------------|---------------------------------------------|---------------------------------------------|---------------------------------------------|-------------------------------------------------------|---------------------------------------------|---------------------------------------------|---------------------------------------------|-------------------------------------------------------|--------------|
| AL 1          | N/A               | Alexandropol   | K. 5, Grave 1               | Male     | 20-30 years         |                          |                          | 0.7100                   | –                                  |                                             |                                             | -6.1                                        | –                                                     |                                             |                                             | -10.7                                       | –                                                     | Gerling 2015 |
| AL 2          | N/A               | Alexandropol   | K. 12, Grave 4              | Male     | 25-30 years         | 0.7099                   |                          |                          | –                                  | -4.6                                        |                                             |                                             | –                                                     | -12.4                                       |                                             |                                             | –                                                     | Gerling 2015 |
| AL 3          | N/A               | Alexandropol   | K. 15, Grave 6              | Male     | 17-22 years         | 0.7100                   |                          |                          | –                                  | -6.1                                        |                                             |                                             | –                                                     | -12.0                                       |                                             |                                             | –                                                     | Gerling 2015 |
| AL 4          | N/A               | Alexandropol   | K. 15, Grave 8              | Male     | 45-55 years         |                          |                          | 0.7096                   | –                                  |                                             |                                             | -6.7                                        | –                                                     |                                             |                                             | -10.6                                       | –                                                     | Gerling 2015 |
| AL 5          | N/A               | Alexandropol   | K. 10, Grave 3              | Male     | 25-35 years         |                          |                          | 0.7098                   | –                                  |                                             |                                             | -5.4                                        | –                                                     |                                             |                                             | -11.9                                       | –                                                     | Gerling 2015 |
| O1            | N/A               | Babina Mogila  | burial chamber 1            | Male     | old adult           | 0.7099                   |                          |                          | –                                  | -5.2                                        |                                             |                                             | –                                                     | -11.9                                       |                                             |                                             | –                                                     | Gerling 2015 |
| O3            | N/A               | Babina Mogila  | burial chamber 3            | Subadult | 13-15 years         | 0.7095                   |                          |                          | –                                  | -6.4                                        |                                             |                                             | –                                                     | -14.3                                       |                                             |                                             | –                                                     | Gerling 2015 |
| O4            | N/A               | Drana Kokhta   | niche 5                     | Subadult | 14-15 years         |                          |                          | 0.7107                   | –                                  |                                             |                                             | -5.3                                        | –                                                     |                                             |                                             | -14.2                                       | –                                                     | Gerling 2015 |
| O16           | N/A               | Drana Kokhta   | central burial              | Male     | 50-55 years         |                          |                          | 0.7098                   | –                                  |                                             |                                             | -5.4                                        | –                                                     |                                             |                                             | -10.4                                       | –                                                     | Gerling 2015 |
| O15           | N/A               | Ordzhonikidze  | K. 15, Grave 1              | Male     | 30-40 years         |                          | 0.7101                   |                          | –                                  |                                             | -5.5                                        |                                             | –                                                     |                                             | -10.3                                       |                                             | –                                                     | Gerling 2015 |
| O12           | N/A               | Ordzhonikidze  | K. 15, Grave 2              | Female   | 40-45 years         |                          |                          | 0.7101                   | –                                  |                                             |                                             | -5.2                                        | –                                                     |                                             |                                             | -10.4                                       | –                                                     | Gerling 2015 |
| O9            | N/A               | Ordzhonikidze  | K. 32, Grave 4 (F)          | Female   | 50-60 years         |                          | 0.7099                   |                          | –                                  |                                             | -4.3                                        |                                             | –                                                     |                                             | -9.3                                        |                                             | –                                                     | Gerling 2015 |
| O14           | N/A               | Ordzhonikidze  | K. 32, Grave 4 (M)          | Male     | 50-60 years         |                          |                          | 0.7100                   | –                                  |                                             |                                             | -5.2                                        | –                                                     |                                             |                                             | -11.3                                       | –                                                     | Gerling 2015 |
| O11           | N/A               | Ordzhonikidze  | K. 33, Grave 1              | Male     | 40-50 years         |                          | 0.7099                   |                          | –                                  |                                             | -5.0                                        |                                             | –                                                     |                                             | -11.4                                       |                                             | –                                                     | Gerling 2015 |
| O13           | N/A               | Ordzhonikidze  | K. 33, Grave 3              | Female   | 40-50 years         |                          |                          | 0.7099                   | –                                  |                                             |                                             | -5.7                                        | –                                                     |                                             |                                             | -10.9                                       | –                                                     | Gerling 2015 |
| O7            | N/A               | Zolotaya Balka | K. 13, Grave 1              | Indet.   |                     | 0.7101                   |                          |                          | –                                  | -5.1                                        |                                             |                                             | –                                                     | -12.2                                       |                                             |                                             | –                                                     | Gerling 2015 |
| O2            | N/A               | Zolotaya Balka | K. 15, Grave 1 (Adult)      | Female   | 22-25 years         | 0.7098                   |                          |                          | –                                  | -4.7                                        |                                             |                                             | –                                                     | -10.3                                       |                                             |                                             | –                                                     | Gerling 2015 |
| O5            | N/A               | Zolotaya Balka | K. 15, Grave 1 (Adolescent) | Indet.   | 12-13 years (15-17) | 0.7099                   |                          |                          | –                                  | -6.1                                        |                                             |                                             | –                                                     | -14.0                                       |                                             |                                             | –                                                     | Gerling 2015 |

|                |     |                |                |        |             |        |        |        |   |      |      |      |   |       |       |       |   |              |
|----------------|-----|----------------|----------------|--------|-------------|--------|--------|--------|---|------|------|------|---|-------|-------|-------|---|--------------|
| O8             | N/A | Zolotaya Balka | K.15, Grave 2  | Male   | 45-55 years |        |        | 0.7092 | - |      |      | -6.0 | - |       |       | -9.6  | - | Gerling 2015 |
| O10            | N/A | Zolotaya Balka | K. 15, Grave 3 | Female | 20-22 years |        | 0.7099 |        | - |      |      | -6.7 | - |       |       | -9.5  | - | Gerling 2015 |
| O6             | N/A | Zolotaya Balka | K. 22, Grave 1 | Female | old adult ? |        |        | 0.7100 | - |      |      | -5.7 | - |       |       | -10.2 | - | Gerling 2015 |
| <b>Average</b> |     |                |                |        |             | 0.7099 | 0.7099 | 0.7099 | - | -5.5 | -5.4 | -5.7 | - | -12.4 | -10.1 | -11.0 | - |              |

S1c Table. Isotope values for individuals from the Iron Age sites of Alexandropol (AL), Babina Mogila (BM), Drana Kokhta (DK), Ordzhonikidze (OR), and Zolotaya Balka (ZB)

| Sample Number | Individual Number | Cemetery           | Grave                              | Individual | # of paired teeth | Sex      | Age Range      | $^{87/86}\text{Sr}$ (M1) | $^{87/86}\text{Sr}$ (M2) | $^{87/86}\text{Sr}$ (M3) | Sr difference between paired teeth | $\delta^{18}\text{O}_{(C)}$ (VDPB) (M1) | $\delta^{18}\text{O}_{(C)}$ (VDPB) (M2) | $\delta^{18}\text{O}_{(C)}$ (VDPB) (M3) | $\delta^{18}\text{O}$ difference between paired teeth | $\delta^{13}\text{C}_{(C)}$ (VDPB) (M1) | $\delta^{13}\text{C}_{(C)}$ (VDPB) (M2) | $\delta^{13}\text{C}_{(C)}$ (VDPB) (M3) | $\delta^{13}\text{C}$ difference between paired teeth | $\delta^{15}\text{N}$ (collagen) | $\delta^{13}\text{C}$ (collagen) |
|---------------|-------------------|--------------------|------------------------------------|------------|-------------------|----------|----------------|--------------------------|--------------------------|--------------------------|------------------------------------|-----------------------------------------|-----------------------------------------|-----------------------------------------|-------------------------------------------------------|-----------------------------------------|-----------------------------------------|-----------------------------------------|-------------------------------------------------------|----------------------------------|----------------------------------|
| 100           | -                 | Pereschepino       | K-22                               | 1 of 4     | -                 | Subadult | 9 - 15 yrs     | -                        | -                        | -                        | -                                  | -                                       | -                                       | -                                       | -                                                     | -                                       | -                                       | -                                       | -                                                     | 11.3                             | -14.2                            |
| 104           | 1                 | Pereschepino       | K-22                               | 2 of 4     | 2                 | Male     | 45 - 55 yrs    | 0.7084                   | -                        | 0.7082                   | 0.0001                             | -5.5                                    | -                                       | -6.3                                    | 0.7                                                   | -10.0                                   | -                                       | -10.1                                   | 0.099                                                 | 11.9                             | -14.7                            |
| 105           | 2                 | Pereschepino       | K-22                               | 3 of 4     | -                 | Indet.   | >21 yrs        | -                        | -                        | 0.7103                   | -                                  | -                                       | -                                       | -7.4                                    | -                                                     | -                                       | -                                       | -7.7                                    | -                                                     | -                                | -                                |
| 107           | 3                 | Pereschepino       | K-22                               | 4 of 4     | 2                 | Subadult | 12 - 18 yrs    | 0.7104                   | -                        | 0.7108                   | 0.0004                             | -4.6                                    | -                                       | -5.8                                    | 1.3                                                   | -9.9                                    | -                                       | -5.8                                    | 4.056                                                 | -                                | -                                |
| 110           | -                 | Pereschepino       | K-15                               | 1 of 2     | -                 | Indet.   | Indet.         | -                        | -                        | -                        | -                                  | -                                       | -                                       | -                                       | -                                                     | -                                       | -                                       | -                                       | -                                                     | 11.3                             | -14.2                            |
| 111           | 4                 | Pereschepino       | K-15                               | 2 of 2     | 2                 | Subadult | 12 - 18 yrs    | 0.7106                   | -                        | 0.7102                   | 0.0004                             | -5.6                                    | -                                       | -7.0                                    | 1.4                                                   | -8.0                                    | -                                       | -8.6                                    | 0.636                                                 | 12.9                             | -16.7                            |
| 114           | -                 | Pereschepino       | K-19                               | 1 of 2     | -                 | Indet.   | 35 - 55 yrs    | -                        | -                        | -                        | -                                  | -                                       | -                                       | -                                       | -                                                     | -                                       | -                                       | -                                       | -                                                     | 12.2                             | -15.7                            |
| 121           | 5                 | Pereschepino       | K-21                               | 1 of 2     | 2                 | Subadult | 7 - 11 yrs     | 0.7109                   | 0.7105                   | -                        | 0.0003                             | -6.7                                    | -8.3                                    | -                                       | 1.6                                                   | -5.8                                    | -3.9                                    | -                                       | 1.876                                                 | 11.0                             | -12.9                            |
| 124           | 6                 | Pereschepino       | K-21                               | 2 of 2     | -                 | Male     | 19 - 48 yrs    | -                        | -                        | 0.7102                   | -                                  | -                                       | -                                       | -7.4                                    | -                                                     | -                                       | -                                       | -8.6                                    | -                                                     | 12.0                             | -15.8                            |
| 125           | -                 | Pereschepino       | K-20                               | 1 of 2     | -                 | Male     | 40 - 44 yrs    | -                        | -                        | -                        | -                                  | -                                       | -                                       | -                                       | -                                                     | -                                       | -                                       | -                                       | -                                                     | 10.9                             | -13.1                            |
| 126           | -                 | Pereschepino       | K-20                               | 2 of 2     | -                 | Indet.   | Indet.         | -                        | -                        | -                        | -                                  | -                                       | -                                       | -                                       | -                                                     | -                                       | -                                       | -                                       | -                                                     | 11.9                             | -15.7                            |
| 128           | -                 | Pereschepino       | K-23                               | 2 of 2     | -                 | Indet.   | Indet.         | -                        | -                        | -                        | -                                  | -                                       | -                                       | -                                       | -                                                     | -                                       | -                                       | -                                       | -                                                     | 10.3                             | -14.6                            |
| 129           | 7                 | Pereschepino       | K-23                               | 1 of 2     | 2                 | Male     | 35 - 50 yrs    | 0.7102                   | -                        | 0.7103                   | 0.0001                             | -6.1                                    | -                                       | -7.2                                    | 1.1                                                   | -6.6                                    | -                                       | -7.0                                    | 0.397                                                 | 11.1                             | -15.1                            |
| 131           | -                 | 5th Field Cemetery | K-1                                | 1 of 1     | -                 | Indet.   | Adult          | -                        | -                        | -                        | -                                  | -                                       | -                                       | -                                       | -                                                     | -                                       | -                                       | -                                       | -                                                     | 11.8                             | -17.0                            |
| 134           | 8                 | Б                  | K-4                                | 1 of 3     | 2                 | Male     | 24 - 55 yrs    | 0.7100                   | -                        | 0.7096                   | 0.0003                             | -6.0                                    | -                                       | -5.8                                    | 0.2                                                   | -11.0                                   | -                                       | -7.9                                    | 3.0265                                                | -                                | -                                |
| 136           | -                 | Pereschepino       | K-22                               | 1b of 4    | -                 | Subadult | >13 yrs        | -                        | -                        | -                        | -                                  | -                                       | -                                       | -                                       | -                                                     | -                                       | -                                       | -                                       | -                                                     | 12.6                             | -16.7                            |
| 138           | 9                 | Б                  | K-4                                | 2 of 3     | 2                 | Subadult | >15 yrs        | -                        | 0.7097                   | 0.7096                   | 0.0001                             | -                                       | -6.2                                    | -6.6                                    | 0.4                                                   | -12.2                                   | -9.0                                    | 9.0                                     | 10.8                                                  | -15.3                            |                                  |
| 141           | 10                | Б                  | K-4                                | 3 of 3     | -                 | Subadult | 8.5 - 11.5 yrs | -                        | 0.7101                   | -                        | -                                  | -                                       | -5.5                                    | -                                       | -                                                     | -                                       | -12.5                                   | -                                       | -                                                     | 11.2                             | -16.6                            |
| 147           | 11                | Б                  | K-3                                | 1 of 1     | -                 | Indet.   | 30 - 35 yrs    | -                        | -                        | 0.7099                   | -                                  | -                                       | -                                       | -7.4                                    | -                                                     | -                                       | -                                       | -8.2                                    | -                                                     | 11.7                             | -16.2                            |
| 148           | -                 | Tsarina            | Ash mound 1, Altar 2               | 2 of 3     | -                 | Female   | >35 yrs        | -                        | -                        | -                        | -                                  | -                                       | -                                       | -                                       | -                                                     | -                                       | -                                       | -                                       | -                                                     | 10.6                             | -15.1                            |
| 149           | -                 | Tsarina            | Ash mound 1, Altar 2               | 3 of 3     | -                 | Male     | Adult          | -                        | -                        | -                        | -                                  | -                                       | -                                       | -                                       | -                                                     | -                                       | -                                       | -                                       | -                                                     | 11.0                             | -15.5                            |
| 172           | 12                | Tsarina            | Ash mound 1, square L-02, Shtyke 3 | 1 of 1     | -                 | Subadult | 6 - 10 yrs     | 0.7105                   | -                        | -                        | -                                  | -7.3                                    | -                                       | -                                       | -                                                     | -7.8                                    | -                                       | -                                       | -                                                     | 11.6                             | -15.3                            |
| 144           | 13                | Tsarina            | Ash mound 1 altar 2                | 1 of 3     | 2                 | Male     | >40 yrs        | 0.7101                   | -                        | 0.7102                   | 0.0001                             | Failed                                  | -                                       | -6.4                                    | -                                                     | Failed                                  | -                                       | -10.0                                   | -                                                     | -                                | -                                |
| 157           | 14                | Tsarina            | Ash mound 3, square A-2, sht. 3    | 1 of 1     | 2                 | Male     | 20 - 35 yrs    | 0.7102                   | -                        | 0.7089                   | 0.0013                             | -5.7                                    | -                                       | -6.9                                    | 1.2                                                   | -12.6                                   | -                                       | -11.4                                   | 1.2                                                   | 10.7                             | -16.8                            |

|                |    |                              |                                         |               |   |          |             |            |               |            |               |             |             |             |            |             |             |             |            |             |              |
|----------------|----|------------------------------|-----------------------------------------|---------------|---|----------|-------------|------------|---------------|------------|---------------|-------------|-------------|-------------|------------|-------------|-------------|-------------|------------|-------------|--------------|
| 159            | -  | Tsarina                      | Ash mound 3, Altar 3, sk. 2             |               | - | Subadult | >13 yrs     | -          | -             | -          | -             | -           | -           | -           | -          | -           | -           | -           | 11.7       | -15.2       |              |
| 160            | 15 | Tsarina                      | Ash mound 3, skeleton 1 (by tag on bag) |               | 2 | Indet.   | 40 - 50 yrs | 0.7088     | -             | 0.7096     | 0.0008        | -4.6        | -           | -6.2        | 1.5        | -7.3        | -           | -10.9       | 3.6        | -           | -            |
| 164            | 16 | Tsarina                      | Ash mound 3, A-24, Altar                |               | 2 | Female   | >21 yrs     | -          | 0.7104        | 0.7104     | 0.0000        | -           | -8.1        | -7.2        | 0.9        | -           | -7.1        | -9.3        | 2.2        | 10.5        | -15.2        |
| 166            | 17 | Tsarina                      | Altar skeleton 1                        |               | 2 | Female   | 20 - 24 yrs | 0.7091     | -             | 0.7102     | 0.0012        | -7.1        | -           | -7.5        | 0.4        | -11.0       | -           | -9.9        | 1.0        | -           | -            |
| 168            | -  | Tsarina                      | Ash mound 1, square L-02, Shtyke 3      |               | - | Indet.   | Adult       | -          | -             | -          | -             | -           | -           | -           | -          | -           | -           | -           | -          | 11.6        | -16.4        |
| 169            | -  | Tsarina                      | Square Zh.1, Shtyke 5                   |               | - | Indet.   | Indet.      | -          | -             | -          | -             | -           | -           | -           | -          | -           | -           | -           | -          | 11.4        | -15.3        |
| 151            | 18 | Field 8                      | Kurgan-2                                | 0 of 2        | 2 | Male     | >45 yrs     | 0.7102     | 0.7102        | -          | 0.0000        | -7.2        | -8.5        | -           | 1.3        | -8.4        | -11.0       | -           | 2.6        | 11.5        | -16.5        |
| 153            | -  | Field 8                      | Kurgan-2                                | 1 of 2        | - | Indet.   | Adult       | -          | -             | -          | -             | -           | -           | -           | -          | -           | -           | -           | -          | 12.0        | -16.5        |
| 154            | -  | Field 8                      | Kurgan-2                                | 2 of 2        | - | Indet.   | Adult       | -          | -             | -          | -             | -           | -           | -           | -          | -           | -           | -           | -          | 11.5        | -17.6        |
| 178            | 19 | Osnyagi 3rd Field            | K1, Sq. T-5, 0.9-1.2m                   | 1             | 2 | Male     | >45 yrs     | 0.7103     | 0.7103        | -          | 0.0000        | -7.2        | -7.2        | -           | 0.0        | -7.1        | -6.5        | -           | 0.6        | 11.2        | -12.8        |
| 181            | 20 | Marchenki 9th Field Cemetery | K1, N. 2, Sq. IK-18, 1.2 m              | 2 of 2        | 2 | Indet.   | > 45 yrs    | 0.7089     | 0.7099        | -          | 0.0009        | -5.8        | -6.5        | -           | 0.6        | -9.6        | -12.3       | -           | 2.6        | 11.2        | -16.2        |
| 146            | 21 | Б                            | K-3                                     | Rodent        | - | Indet.   | 30 - 35 yrs | 0.7102     | -             | -          | -             | -           | -           | -           | -          | -           | -           | -           | -          | -           | -            |
| <b>Average</b> |    |                              |                                         |               |   |          |             | <b>0.7</b> | <b>0.7102</b> | <b>0.7</b> | <b>0.0004</b> | <b>-6.1</b> | <b>-7.2</b> | <b>-6.8</b> | <b>0.9</b> | <b>-8.9</b> | <b>-9.4</b> | <b>-8.9</b> | <b>2.2</b> | <b>11.4</b> | <b>-15.5</b> |
| 101            |    | Pereschepino                 | K-19                                    | Fauna (Sheep) | - |          |             | -          | -             | -          | -             | -           | -           | -           | -          | -           | -           | -           | -          | 7.8         | -19.8        |
| 132            |    | 5th Field                    | K-1                                     | Fauna (Sheep) | - |          |             | -          | -             | -          | -             | -           | -           | -           | -          | -           | -           | -           | -          | 9.3         | -18.2        |
| 120            |    | Pereschepino                 | K-21                                    | Fauna (Pig?)  | - |          |             | -          | -             | -          | -             | -           | -           | -           | -          | -           | -           | -           | -          | 8.8         | -16.3        |
| <b>Average</b> |    |                              |                                         |               |   |          |             |            |               |            |               |             |             |             |            |             |             |             |            | <b>8.6</b>  | <b>-18.1</b> |

S1d Table. Isotope values for humans and fauna from the Iron Age site of Bel'sk (BE)

| Sample Number | Time Period | Cemetery         | Grave               | Individual | # of paired teeth | Sex      | Age Range   | <sup>87/86</sup> Sr (M1) | <sup>87/86</sup> Sr (M2) | <sup>87/86</sup> Sr (M3) | Sr difference between paired teeth | $\delta^{18}\text{O}_{(\text{C})}$ (VDPB) (M1) | $\delta^{18}\text{O}_{(\text{C})}$ (VDPB) (M2) | $\delta^{18}\text{O}_{(\text{C})}$ (VDPB) (M3) | $\delta^{18}\text{O}$ difference between paired teeth | Reference    |
|---------------|-------------|------------------|---------------------|------------|-------------------|----------|-------------|--------------------------|--------------------------|--------------------------|------------------------------------|------------------------------------------------|------------------------------------------------|------------------------------------------------|-------------------------------------------------------|--------------|
| UK 7, 46      | Yamnaya     | Kirovograd       | 5                   |            | 2                 | Male     | 25-35 years | 0.7101                   | 0.7100                   |                          | 0.0001                             |                                                | -5.4                                           |                                                | -                                                     | Gerling 2015 |
| UK 8, 43      | Yamnaya     | Kirovograd       | 10                  |            | 2                 | Subadult | 8-11 years  | 0.7111                   | 0.7120                   |                          | 0.0009                             | -4.9                                           | -5.8                                           |                                                | 0.97                                                  | Gerling 2015 |
| UK 44, 45     | Yamnaya     | Kirovograd       | 10                  |            | 2                 | Male     | 35-45 years |                          | 0.7114                   | 0.7111                   | 0.0003                             |                                                | -5.2                                           |                                                | -                                                     | Gerling 2015 |
| SU 11         | Yamnaya     | Kirovograd       | 14                  |            | -                 | Male     | 30-35 years | 0.7108                   |                          |                          | -                                  | -4.7                                           |                                                |                                                | -                                                     | Gerling 2015 |
| SU 10         | Yamnaya     | Kirovograd       | 16                  |            | -                 | Male     | 45-50 years |                          | 0.7099                   |                          | -                                  |                                                | -7.2                                           |                                                | -                                                     | Gerling 2015 |
| UK 41, 42     | Yamnaya     | Kirovograd       | 20                  |            | -                 | Male     | 45-55 years |                          | 0.7105                   | 0.7095                   | 0.0009                             |                                                | -5.8                                           |                                                | -                                                     | Gerling 2015 |
| UK 9, 47      | Yamnaya     | Kirovograd       | 24                  |            | -                 | Subadult | 15-18 years | 0.7108                   | 0.7108                   |                          | 0.0001                             |                                                | -5.6                                           |                                                | -                                                     | Gerling 2015 |
| UK 48, 49     | Catacomb    | Kirovograd       | 13                  |            | -                 | Male     | 35-50 years | 0.7106                   | 0.7107                   |                          | 0.0001                             | -4.7                                           | -4.7                                           |                                                | 0.01                                                  | Gerling 2015 |
| UK 38, 33     | Eneolithic  | Peshtchanka      | Kurgan 1, Burial 6  |            | 2                 | Male     | 45-50 years | 0.7108                   |                          | 0.7104                   | 0.0005                             |                                                |                                                | -5.7                                           | -                                                     | Gerling 2015 |
| UK 39, 34     | Eneolithic  | Peshtchanka      | Kurgan 1, Burial 7  |            | 2                 | Male     | 30-40 years |                          | 0.7104                   | 0.7107                   | 0.0003                             |                                                |                                                | -4.9                                           | -                                                     | Gerling 2015 |
| UK 4, 36      | Eneolithic  | Peshtchanka      | Kurgan 1, Burial 14 |            | 2                 | Male     | 35-40 years | 0.7098                   | 0.7096                   |                          | 0.0002                             | -7.8                                           | -7.5                                           |                                                | 0.26                                                  | Gerling 2015 |
| UK 2, 37      | Eneolithic  | Peshtchanka      | Kurgan 1, Burial 15 |            | 2                 | Female   | 30-40 years | 0.7105                   | 0.7105                   |                          | 0.0001                             |                                                | -5.8                                           |                                                | -                                                     | Gerling 2015 |
| UK 1, 40      | Yamnaya     | Peshtchanka      | Kurgan 1, Burial 10 |            | 2                 | Male     | 25-30 years | 0.7102                   |                          | 0.7102                   | 0.0000                             | -5.0                                           |                                                | -4.7                                           | 0.33                                                  | Gerling 2015 |
| UK 10, 35     | Yamnaya     | Peshtchanka      | Kurgan 1, Burial 11 |            | 2                 | Subadult | 11-13 years | 0.7104                   | 0.7104                   |                          | 0.0000                             | -4.8                                           | -5.4                                           |                                                | 0.66                                                  | Gerling 2015 |
| UK 58, 57     | Catacomb    | Peshtchanka      | Kurgan 1, Burial 12 |            | 2                 | Indet.   | Indet.      | 0.7102                   | 0.7101                   |                          | 0.0001                             | -4.2                                           | -5.8                                           |                                                | 1.61                                                  | Gerling 2015 |
| UK 51, 52     | Yamnaya     | Shakhta Stepnaya | Kurgan 2, Burial 7  |            | 2                 | Male     | 35-40 years | 0.7099                   |                          | 0.7100                   | 0.0000                             | -5.8                                           |                                                |                                                | -                                                     | Gerling 2015 |
| UK 53, 54     | Yamnaya     | Shakhta Stepnaya | Kurgan 4, Burial 11 |            | 2                 | Indet.   | 40-45 years |                          | 0.7100                   | 0.7100                   | 0.0000                             |                                                | -5.4                                           | -4.9                                           | 0.53                                                  | Gerling 2015 |

|           |                |                  |                      |   |  |   |                  |             |        |        |        |        |        |      |      |      |      |              |
|-----------|----------------|------------------|----------------------|---|--|---|------------------|-------------|--------|--------|--------|--------|--------|------|------|------|------|--------------|
| UK 50     | Catacomb       | Shakhta Stepnaya | Kurgan 2, Burial 4   |   |  | – | Female           | 25-35 years | 0.7098 |        |        |        | –      | -4.6 |      |      | –    | Gerling 2015 |
| UK 55, 56 | Catacomb       | Shakhta Stepnaya | Kurgan 4, Burial 10  |   |  | 2 | Female           | 20-25 years | 0.7100 |        | 0.7100 |        | 0.0000 | -5.0 |      | -5.2 | 0.28 | Gerling 2015 |
| UK 30     | Eneolithic     | Vinogradnoe      | Kurgan 3, Burial 15  |   |  | – | Male             | 35-40 years |        |        | 0.7099 |        | –      |      |      | -5.5 | –    | Gerling 2015 |
| UK 14     | Eneolithic     | Vinogradnoe      | Kurgan 24, Burial 30 |   |  |   | Male             | 40-50 years |        |        | 0.7101 |        | –      |      |      | -4.3 | –    | Gerling 2015 |
| UK 27, 31 | Yamnaya        | Vinogradnoe      | Kurgan 3, Burial 25  |   |  | 2 | Male             | ~ 25 years  |        |        | 0.7099 | 0.7098 | 0.0001 |      | -4.9 | -6.4 | 1.46 | Gerling 2015 |
| UK 3, 22  | Yamnaya        | Vinogradnoe      | Kurgan 24, Burial 8  | 1 |  | 2 | Indet. (Male?)   | 23-25 years | 0.7098 | 0.7098 |        |        | 0.0001 |      | -5.0 |      | –    | Gerling 2015 |
| UK 11, 12 | Yamnaya        | Vinogradnoe      | Kurgan 24, Burial 8  | 2 |  | 2 | Subadult         | 11-14 years | 0.7096 | 0.7096 |        |        | 0.0000 | -4.2 | -4.7 |      | 0.48 | Gerling 2015 |
| UK 21     | Yamnaya        | Vinogradnoe      | Kurgan 24, Burial 31 |   |  |   | Male             | 30-45 years |        |        | 0.7099 |        | –      |      |      | -5.5 | –    | Gerling 2015 |
| UK 28     | Early Catacomb | Vinogradnoe      | Kurgan 24, Burial 15 | 1 |  | – | Male             | 35-45 years |        |        | 0.7098 |        | –      |      |      | -6.6 | –    | Gerling 2015 |
| UK 15, 23 | Early Catacomb | Vinogradnoe      | Kurgan 24, Burial 15 | 2 |  | 2 | Female           | 30-45 years |        |        | 0.7096 | 0.7095 | 0.0001 |      |      | -5.1 | –    | Gerling 2015 |
| UK 13     | Early Catacomb | Vinogradnoe      | Kurgan 24, Burial 19 | 1 |  |   | Male             | 25-35 years |        |        | 0.7102 |        | –      |      |      | -5.1 | –    | Gerling 2015 |
| UK 6, 16  | Early Catacomb | Vinogradnoe      | Kurgan 24, Burial 22 |   |  | 2 | Male             | 17-20 years | 0.7098 |        | 0.7099 |        | 0.0000 | -3.6 |      | -5.1 | 1.46 | Gerling 2015 |
| UK 24     | Early Catacomb | Vinogradnoe      | Kurgan 24, Burial 34 | 1 |  |   | Female           | 30-35 years |        |        | 0.7098 |        | –      |      |      | -6.0 | –    | Gerling 2015 |
| UK 19     | Early Catacomb | Vinogradnoe      | Kurgan 24, Burial 34 | 2 |  |   | Male             | 30-35 years |        |        | 0.7097 |        | –      |      |      | -5.9 | –    | Gerling 2015 |
| UK 20, 18 | Catacomb       | Vinogradnoe      | Kurgan 24, Burial 17 | 1 |  | 2 | Male             | 45-55 years | 0.7100 | 0.7098 |        |        | 0.0002 | -4.7 | -6.0 |      | 1.27 | Gerling 2015 |
| UK 32, 29 | Catacomb       | Vinogradnoe      | Kurgan 3, Burial 36  |   |  | 2 | Indet. (Female?) | 50-55 years | 0.7099 | 0.7099 |        |        | 0.0000 | -4.4 | -4.9 |      | 0.48 | Gerling 2015 |
| UK 17, 25 | Catacomb       | Vinogradnoe      | Kurgan 24, Burial 26 |   |  | 2 | Male             | 30-40 years | 0.7098 |        | 0.7096 |        | 0.0001 |      |      | -6.2 | –    | Gerling 2015 |
| UK 5, 26  | Catacomb       | Vinogradnoe      | Kurgan 24, Burial 32 |   |  | 2 | Male             | 40-45 years | 0.7099 | 0.7098 |        |        | 0.0001 | -4.5 |      |      | –    | Gerling 2015 |
| OU 2      | Catacomb       | Nevskoe          | Kurgan 2, Burial 10  |   |  |   | Indet.           | Adult       |        |        | 0.7092 |        | –      |      |      | -6.0 | –    | Gerling 2015 |

|                |          |         |                    |  |  |        |          |        |        |        |        |      |      |      |      |   |              |              |
|----------------|----------|---------|--------------------|--|--|--------|----------|--------|--------|--------|--------|------|------|------|------|---|--------------|--------------|
| OU 1           | Catacomb | Nevskoe | Kurgan 3, Burial 3 |  |  | Indet. | Adult    | 0.7090 |        |        |        | -    | -5.8 |      |      | - | Gerling 2015 |              |
| OU 3           | Catacomb | Nevskoe | Kurgan 4, Burial 2 |  |  | Indet. | Adult    |        | 0.7091 |        |        | -    |      | -5.5 |      |   | -            | Gerling 2015 |
| OU 5           | Catacomb | Nevskoe | Kurgan 4, Burial 3 |  |  | Indet. | Adult    |        |        | 0.7092 |        | -    |      |      | -6.1 |   |              | Gerling 2015 |
| OU 4           | Catacomb | Nevskoe | Kurgan 5, Burial 9 |  |  | Male   | 18 years | 0.7091 |        |        |        | -    | -4.0 |      |      |   |              | Gerling 2015 |
| <b>Average</b> |          |         |                    |  |  |        |          | 0.7101 | 0.7102 | 0.7099 | 0.0002 | -4.9 | -5.6 | -5.5 | 0.8  |   |              |              |

S1e Table. Isotope values for individuals from early sites of Kirovograd (KI), Peshtchanka (PE), Shakhta Stepnaya (SH), Vinogradnoe (VI), and Nevskoe (NE)



| Period (site code) - compared to - Period (site code) | diff       | p adj    |
|-------------------------------------------------------|------------|----------|
| Eneolithic (PE)-Eneolithic (VI)                       | -1.462     | 0.862022 |
| Yamnaya (KI)-Eneolithic (VI)                          | -0.68      | 0.999968 |
| Yamnaya (PE)-Eneolithic (VI)                          | -0.0725    | 1.000000 |
| Yamnaya (SH)-Eneolithic (VI)                          | -0.4466667 | 1.000000 |
| Yamnaya (VI)-Eneolithic (VI)                          | -0.2033333 | 1.000000 |
| Early Catacomb (VI)-Eneolithic (VI)                   | -0.4557143 | 1.000000 |
| Catacomb (KI)-Eneolithic (VI)                         | 0.175      | 1.000000 |
| Catacomb (PE)-Eneolithic (VI)                         | -0.095     | 1.000000 |
| Catacomb (NE)-Eneolithic (VI)                         | -0.596     | 0.999998 |
| Catacomb (SH)-Eneolithic (VI)                         | -0.0533333 | 1.000000 |
| Catacomb (VI)-Eneolithic (VI)                         | -0.215     | 1.000000 |
| Iron Age (AL)-Eneolithic (VI)                         | -0.89      | 0.999307 |
| Iron Age (BM)-Eneolithic (VI)                         | -0.91      | 0.999924 |
| Iron Age (DK)-Eneolithic (VI)                         | -0.46      | 1.000000 |
| Iron Age (OR)-Eneolithic (VI)                         | -0.26      | 1.000000 |
| Iron Age (ZB)-Eneolithic (VI)                         | -0.8266667 | 0.999649 |
| Iron Age (ME)-Eneolithic (VI)                         | -1.11      | 0.972068 |
| Iron Age (MG)-Eneolithic (VI)                         | -0.8715385 | 0.997103 |
| Iron Age (BE)-Eneolithic (VI)                         | -1.77      | 0.308882 |
| Yamnaya (KI)-Eneolithic (PE)                          | 0.782      | 0.984634 |
| Yamnaya (PE)-Eneolithic (PE)                          | 1.3895     | 0.614600 |
| Yamnaya (SH)-Eneolithic (PE)                          | 1.0153333  | 0.982272 |
| Yamnaya (VI)-Eneolithic (PE)                          | 1.2586667  | 0.608151 |
| Early Catacomb (VI)-Eneolithic (PE)                   | 1.0062857  | 0.878124 |
| Catacomb (KI)-Eneolithic (PE)                         | 1.637      | 0.713215 |
| Catacomb (PE)-Eneolithic (PE)                         | 1.367      | 0.918438 |
| Catacomb (NE)-Eneolithic (PE)                         | 0.866      | 0.984926 |
| Catacomb (SH)-Eneolithic (PE)                         | 1.4086667  | 0.735679 |
| Catacomb (VI)-Eneolithic (PE)                         | 1.247      | 0.625199 |
| Iron Age (AL)-Eneolithic (PE)                         | 0.572      | 0.999931 |
| Iron Age (BM)-Eneolithic (PE)                         | 0.552      | 1.000000 |
| Iron Age (DK)-Eneolithic (PE)                         | 1.002      | 0.996790 |
| Iron Age (OR)-Eneolithic (PE)                         | 1.202      | 0.689494 |
| Iron Age (ZB)-Eneolithic (PE)                         | 0.6353333  | 0.999425 |
| Iron Age (ME)-Eneolithic (PE)                         | 0.352      | 1.000000 |
| Iron Age (MG)-Eneolithic (PE)                         | 0.5904615  | 0.996389 |
| Iron Age (BE)-Eneolithic (PE)                         | -0.308     | 1.000000 |
| Yamnaya (PE)-Yamnaya (KI)                             | 0.6075     | 0.999736 |
| Yamnaya (SH)-Yamnaya (KI)                             | 0.2333333  | 1.000000 |
| Yamnaya (VI)-Yamnaya (KI)                             | 0.4766667  | 0.999952 |
| Early Catacomb (VI)-Yamnaya (KI)                      | 0.2242857  | 1.000000 |

|                                  |            |          |
|----------------------------------|------------|----------|
| Catacomb (KI)-Yamnaya (KI)       | 0.855      | 0.999134 |
| Catacomb (PE)-Yamnaya (KI)       | 0.585      | 0.999997 |
| Catacomb (NE)-Yamnaya (KI)       | 0.084      | 1.000000 |
| Catacomb (SH)-Yamnaya (KI)       | 0.6266667  | 0.999903 |
| Catacomb (VI)-Yamnaya (KI)       | 0.465      | 0.999967 |
| Iron Age (AL)-Yamnaya (KI)       | -0.21      | 1.000000 |
| Iron Age (BM)-Yamnaya (KI)       | -0.23      | 1.000000 |
| Iron Age (DK)-Yamnaya (KI)       | 0.22       | 1.000000 |
| Iron Age (OR)-Yamnaya (KI)       | 0.42       | 0.999993 |
| Iron Age (ZB)-Yamnaya (KI)       | -0.1466667 | 1.000000 |
| Iron Age (ME)-Yamnaya (KI)       | -0.43      | 0.999874 |
| Iron Age (MG)-Yamnaya (KI)       | -0.1915385 | 1.000000 |
| Iron Age (BE)-Yamnaya (KI)       | -1.09      | 0.120345 |
| Yamnaya (SH)-Yamnaya (PE)        | -0.3741667 | 1.000000 |
| Yamnaya (VI)-Yamnaya (PE)        | -0.1308333 | 1.000000 |
| Early Catacomb (VI)-Yamnaya (PE) | -0.3832143 | 1.000000 |
| Catacomb (KI)-Yamnaya (PE)       | 0.2475     | 1.000000 |
| Catacomb (PE)-Yamnaya (PE)       | -0.0225    | 1.000000 |
| Catacomb (NE)-Yamnaya (PE)       | -0.5235    | 0.999993 |
| Catacomb (SH)-Yamnaya (PE)       | 0.0191667  | 1.000000 |
| Catacomb (VI)-Yamnaya (PE)       | -0.1425    | 1.000000 |
| Iron Age (AL)-Yamnaya (PE)       | -0.8175    | 0.996028 |
| Iron Age (BM)-Yamnaya (PE)       | -0.8375    | 0.999816 |
| Iron Age (DK)-Yamnaya (PE)       | -0.3875    | 1.000000 |
| Iron Age (OR)-Yamnaya (PE)       | -0.1875    | 1.000000 |
| Iron Age (ZB)-Yamnaya (PE)       | -0.7541667 | 0.997641 |
| Iron Age (ME)-Yamnaya (PE)       | -1.0375    | 0.831631 |
| Iron Age (MG)-Yamnaya (PE)       | -0.7990385 | 0.964870 |
| Iron Age (BE)-Yamnaya (PE)       | -1.6975    | 0.026637 |
| Yamnaya (VI)-Yamnaya (SH)        | 0.2433333  | 1.000000 |
| Early Catacomb (VI)-Yamnaya (SH) | -0.0090476 | 1.000000 |
| Catacomb (KI)-Yamnaya (SH)       | 0.6216667  | 0.999999 |
| Catacomb (PE)-Yamnaya (SH)       | 0.3516667  | 1.000000 |
| Catacomb (NE)-Yamnaya (SH)       | -0.1493333 | 1.000000 |
| Catacomb (SH)-Yamnaya (SH)       | 0.3933333  | 1.000000 |
| Catacomb (VI)-Yamnaya (SH)       | 0.2316667  | 1.000000 |
| Iron Age (AL)-Yamnaya (SH)       | -0.4433333 | 1.000000 |
| Iron Age (BM)-Yamnaya (SH)       | -0.4633333 | 1.000000 |
| Iron Age (DK)-Yamnaya (SH)       | -0.0133333 | 1.000000 |
| Iron Age (OR)-Yamnaya (SH)       | 0.1866667  | 1.000000 |
| Iron Age (ZB)-Yamnaya (SH)       | -0.38      | 1.000000 |
| Iron Age (ME)-Yamnaya (SH)       | -0.6633333 | 0.999568 |
| Iron Age (MG)-Yamnaya (SH)       | -0.4248718 | 0.999999 |
| Iron Age (BE)-Yamnaya (SH)       | -1.3233333 | 0.500267 |

|                                   |            |          |
|-----------------------------------|------------|----------|
| Early Catacomb (VI)-Yamnaya (VI)  | -0.252381  | 1.000000 |
| Catacomb (KI)-Yamnaya (VI)        | 0.3783333  | 1.000000 |
| Catacomb (PE)-Yamnaya (VI)        | 0.1083333  | 1.000000 |
| Catacomb (NE)-Yamnaya (VI)        | -0.3926667 | 1.000000 |
| Catacomb (SH)-Yamnaya (VI)        | 0.15       | 1.000000 |
| Catacomb (VI)-Yamnaya (VI)        | -0.0116667 | 1.000000 |
| Iron Age (AL)-Yamnaya (VI)        | -0.6866667 | 0.998387 |
| Iron Age (BM)-Yamnaya (VI)        | -0.7066667 | 0.999964 |
| Iron Age (DK)-Yamnaya (VI)        | -0.2566667 | 1.000000 |
| Iron Age (OR)-Yamnaya (VI)        | -0.0566667 | 1.000000 |
| Iron Age (ZB)-Yamnaya (VI)        | -0.6233333 | 0.999154 |
| Iron Age (ME)-Yamnaya (VI)        | -0.9066667 | 0.820890 |
| Iron Age (MG)-Yamnaya (VI)        | -0.6682051 | 0.967603 |
| Iron Age (BE)-Yamnaya (VI)        | -1.5666667 | 0.006978 |
| Catacomb (KI)-Early Catacomb (VI) | 0.6307143  | 0.999992 |
| Catacomb (PE)-Early Catacomb (VI) | 0.3607143  | 1.000000 |
| Catacomb (NE)-Early Catacomb (VI) | -0.1402857 | 1.000000 |
| Catacomb (SH)-Early Catacomb (VI) | 0.402381   | 1.000000 |
| Catacomb (VI)-Early Catacomb (VI) | 0.2407143  | 1.000000 |
| Iron Age (AL)-Early Catacomb (VI) | -0.4342857 | 0.999997 |
| Iron Age (BM)-Early Catacomb (VI) | -0.4542857 | 1.000000 |
| Iron Age (DK)-Early Catacomb (VI) | -0.0042857 | 1.000000 |
| Iron Age (OR)-Early Catacomb (VI) | 0.1957143  | 1.000000 |
| Iron Age (ZB)-Early Catacomb (VI) | -0.3709524 | 0.999999 |
| Iron Age (ME)-Early Catacomb (VI) | -0.6542857 | 0.984148 |
| Iron Age (MG)-Early Catacomb (VI) | -0.4158242 | 0.999789 |
| Iron Age (BE)-Early Catacomb (VI) | -1.3142857 | 0.031229 |
| Catacomb (PE)-Catacomb (KI)       | -0.27      | 1.000000 |
| Catacomb (NE)-Catacomb (KI)       | -0.771     | 0.999909 |
| Catacomb (SH)-Catacomb (KI)       | -0.2283333 | 1.000000 |
| Catacomb (VI)-Catacomb (KI)       | -0.39      | 1.000000 |
| Iron Age (AL)-Catacomb (KI)       | -1.065     | 0.993336 |
| Iron Age (BM)-Catacomb (KI)       | -1.085     | 0.999096 |
| Iron Age (DK)-Catacomb (KI)       | -0.635     | 1.000000 |
| Iron Age (OR)-Catacomb (KI)       | -0.435     | 1.000000 |
| Iron Age (ZB)-Catacomb (KI)       | -1.0016667 | 0.995696 |
| Iron Age (ME)-Catacomb (KI)       | -1.285     | 0.896574 |
| Iron Age (MG)-Catacomb (KI)       | -1.0465385 | 0.976904 |
| Iron Age (BE)-Catacomb (KI)       | -1.945     | 0.164999 |

\*

|                             |            |          |
|-----------------------------|------------|----------|
| Catacomb (NE)-Catacomb (PE) | -0.501     | 1.000000 |
| Catacomb (SH)-Catacomb (PE) | 0.0416667  | 1.000000 |
| Catacomb (VI)-Catacomb (PE) | -0.12      | 1.000000 |
| Iron Age (AL)-Catacomb (PE) | -0.795     | 0.999858 |
| Iron Age (BM)-Catacomb (PE) | -0.815     | 0.999986 |
| Iron Age (DK)-Catacomb (PE) | -0.365     | 1.000000 |
| Iron Age (OR)-Catacomb (PE) | -0.165     | 1.000000 |
| Iron Age (ZB)-Catacomb (PE) | -0.7316667 | 0.999940 |
| Iron Age (ME)-Catacomb (PE) | -1.015     | 0.989125 |
| Iron Age (MG)-Catacomb (PE) | -0.7765385 | 0.999354 |
| Iron Age (BE)-Catacomb (PE) | -1.675     | 0.410690 |
| Catacomb (SH)-Catacomb (NE) | 0.5426667  | 0.999997 |
| Catacomb (VI)-Catacomb (NE) | 0.381      | 1.000000 |
| Iron Age (AL)-Catacomb (NE) | -0.294     | 1.000000 |
| Iron Age (BM)-Catacomb (NE) | -0.314     | 1.000000 |
| Iron Age (DK)-Catacomb (NE) | 0.136      | 1.000000 |
| Iron Age (OR)-Catacomb (NE) | 0.336      | 1.000000 |
| Iron Age (ZB)-Catacomb (NE) | -0.2306667 | 1.000000 |
| Iron Age (ME)-Catacomb (NE) | -0.514     | 0.999820 |
| Iron Age (MG)-Catacomb (NE) | -0.2755385 | 1.000000 |
| Iron Age (BE)-Catacomb (NE) | -1.174     | 0.293929 |
| Catacomb (VI)-Catacomb (SH) | -0.1616667 | 1.000000 |
| Iron Age (AL)-Catacomb (SH) | -0.8366667 | 0.998161 |
| Iron Age (BM)-Catacomb (SH) | -0.8566667 | 0.999881 |
| Iron Age (DK)-Catacomb (SH) | -0.4066667 | 1.000000 |
| Iron Age (OR)-Catacomb (SH) | -0.2066667 | 1.000000 |
| Iron Age (ZB)-Catacomb (SH) | -0.7733333 | 0.998995 |
| Iron Age (ME)-Catacomb (SH) | -1.0566667 | 0.917142 |
| Iron Age (MG)-Catacomb (SH) | -0.8182051 | 0.987898 |
| Iron Age (BE)-Catacomb (SH) | -1.7166667 | 0.095908 |
| Iron Age (AL)-Catacomb (VI) | -0.675     | 0.998709 |
| Iron Age (BM)-Catacomb (VI) | -0.695     | 0.999972 |
| Iron Age (DK)-Catacomb (VI) | -0.245     | 1.000000 |
| Iron Age (OR)-Catacomb (VI) | -0.045     | 1.000000 |
| Iron Age (ZB)-Catacomb (VI) | -0.6116667 | 0.999344 |
| Iron Age (ME)-Catacomb (VI) | -0.895     | 0.836128 |
| Iron Age (MG)-Catacomb (VI) | -0.6565385 | 0.972776 |
| Iron Age (BE)-Catacomb (VI) | -1.555     | 0.007811 |
| Iron Age (BM)-Iron Age (AL) | -0.02      | 1.000000 |
| Iron Age (DK)-Iron Age (AL) | 0.43       | 1.000000 |
| Iron Age (OR)-Iron Age (AL) | 0.63       | 0.999488 |
| Iron Age (ZB)-Iron Age (AL) | 0.0633333  | 1.000000 |
| Iron Age (ME)-Iron Age (AL) | -0.22      | 1.000000 |
| Iron Age (MG)-Iron Age (AL) | 0.0184615  | 1.000000 |
| Iron Age (BE)-Iron Age (AL) | -0.88      | 0.802151 |

\*

|                             |            |          |
|-----------------------------|------------|----------|
| Iron Age (DK)-Iron Age (BM) | 0.45       | 1.000000 |
| Iron Age (OR)-Iron Age (BM) | 0.65       | 0.999990 |
| Iron Age (ZB)-Iron Age (BM) | 0.0833333  | 1.000000 |
| Iron Age (ME)-Iron Age (BM) | -0.2       | 1.000000 |
| Iron Age (MG)-Iron Age (BM) | 0.0384615  | 1.000000 |
| Iron Age (BE)-Iron Age (BM) | -0.86      | 0.997246 |
| Iron Age (OR)-Iron Age (DK) | 0.2        | 1.000000 |
| Iron Age (ZB)-Iron Age (DK) | -0.3666667 | 1.000000 |
| Iron Age (ME)-Iron Age (DK) | -0.65      | 0.999972 |
| Iron Age (MG)-Iron Age (DK) | -0.4115385 | 1.000000 |
| Iron Age (BE)-Iron Age (DK) | -1.31      | 0.828477 |

|                             |            |            |
|-----------------------------|------------|------------|
| Iron Age (ZB)-Iron Age (OR) | -0.5666667 | 0.999773   |
| Iron Age (ME)-Iron Age (OR) | -0.85      | 0.887845   |
| Iron Age (MG)-Iron Age (OR) | -0.6115385 | 0.987045   |
| Iron Age (BE)-Iron Age (OR) | -1.51      | 0.011966 * |
| Iron Age (ME)-Iron Age (ZB) | -0.2833333 | 1.000000   |
| Iron Age (MG)-Iron Age (ZB) | -0.0448718 | 1.000000   |
| Iron Age (BE)-Iron Age (ZB) | -0.9433333 | 0.557939   |
| Iron Age (MG)-Iron Age (ME) | 0.2384615  | 0.999999   |
| Iron Age (BE)-Iron Age (ME) | -0.66      | 0.699633   |
| Iron Age (BE)-Iron Age (MG) | -0.8984615 | 0.009608 * |

|           | Df  | Sum Sq | Mean Sq | F value | Pr(>F)   |
|-----------|-----|--------|---------|---------|----------|
| Site      | 19  | 50.15  | 2.6395  | 3.729   | 4.04E-06 |
| Residuals | 127 | 89.90  | 0.7079  |         |          |

S2a Table. Average oxygen isotope values of individuals compared between sites (separated by time period) using ANOVA and TukeyHSD (95% confidence) and a summary of this comparison of sites (separated by time period)

| Period                    | diff       | p adj      |
|---------------------------|------------|------------|
| Yamnaya-Eneolithic        | 0.6495238  | 0.477090   |
| Early Catacomb-Eneolithic | 0.5885714  | 0.745367   |
| Catacomb-Eneolithic       | 0.8070635  | 0.275370   |
| Iron Age-Eneolithic       | -0.1433739 | 0.994430   |
| Early Catacomb-Yamnaya    | -0.0609524 | 0.999874   |
| Catacomb-Yamnaya          | 0.1575397  | 0.983087   |
| Iron Age-Yamnaya          | -0.7928977 | 0.003811 * |
| Catacomb-Early Catacomb   | 0.2184921  | 0.983080   |
| Iron Age-Early Catacomb   | -0.7319453 | 0.246249   |
| Iron Age-Catacomb         | -0.9504374 | 0.000758 * |

|           | Df  | Sum Sq | Mean Sq | F value | Pr(>F)   |
|-----------|-----|--------|---------|---------|----------|
| Period    | 4   | 22.53  | 5.634   | 6.807   | 4.84E-05 |
| Residuals | 142 | 117.52 | 0.828   |         |          |

S2b Table. Average oxygen isotope values of individuals compared between periods using ANOVA and TukeyHSD (95% confidence) and a summary of this comparison of periods

| Site - compared to - Site    | diff       | p adj    |
|------------------------------|------------|----------|
| Mamai Gora-Medvin            | -2.9339744 | 0.000447 |
| Alexandropol-Medvin          | -4.4616667 | 0.000470 |
| Babina Mogila-Medvin         | -6.0416667 | 0.001197 |
| Drana Khota-Medvin           | -5.2416667 | 0.008247 |
| Ordzhonikidze-Medvin         | -3.5416667 | 0.005596 |
| Zolotaya Balka-Medvin        | -3.9083333 | 0.001435 |
| Belsk-Medvin                 | -1.9122549 | 0.053059 |
| Alexandropol-Mamai Gora      | -1.5276923 | 0.690448 |
| Babina Mogila-Mamai Gora     | -3.1076923 | 0.308833 |
| Drana Khota-Mamai Gora       | -2.3076923 | 0.684763 |
| Ordzhonikidze-Mamai Gora     | -0.6076923 | 0.995938 |
| Zolotaya Balka-Mamai Gora    | -0.974359  | 0.939396 |
| Belsk-Mamai Gora             | 1.0217195  | 0.407883 |
| Babina Mogila-Alexandropol   | -1.58      | 0.969643 |
| Drana Khota-Alexandropol     | -0.78      | 0.999609 |
| Ordzhonikidze-Alexandropol   | 0.92       | 0.991326 |
| Zolotaya Balka-Alexandropol  | 0.5533333  | 0.999657 |
| Belsk-Alexandropol           | 2.5494118  | 0.088858 |
| Drana Khota-Babina Mogila    | 0.8        | 0.999859 |
| Ordzhonikidze-Babina Mogila  | 2.5        | 0.713174 |
| Zolotaya Balka-Babina Mogila | 2.1333333  | 0.847629 |
| Belsk-Babina Mogila          | 4.1294118  | 0.054583 |
| Ordzhonikidze-Drana Khota    | 1.7        | 0.948803 |
| Zolotaya Balka-Drana Khota   | 1.3333333  | 0.986702 |
| Belsk-Drana Khota            | 3.3294118  | 0.218649 |
| Zolotaya Balka-Ordzhonikidze | -0.3666667 | 0.999970 |
| Belsk-Ordzhonikidze          | 1.6294118  | 0.492261 |
| Belsk-Zolotaya Balka         | 1.9960784  | 0.235071 |

|           | Df | Sum Sq | Mean Sq | F value | Pr(>F)   |
|-----------|----|--------|---------|---------|----------|
| Site      | 7  | 169.4  | 24.198  | 7.103   | 1.13E-06 |
| Residuals | 85 | 289.6  | 3.407   |         |          |

S2c Table. Average carbon isotope values of individuals compared between Iron Age sites using ANOVA and TukeyHSD (95% confidence) and a summary of this comparison of periods

| Site             | Period(s)                                     | Average Sr ratio | Median Sr ratio | 3MAD <sub>norm</sub> | Baseline range (3MAD <sub>norm</sub> ) from | Baseline range (3MAD <sub>norm</sub> ) to | # outlying values / # outlying individuals | % outlying individuals | Total number of individuals analyzed | Located in which substrate | Local Sr ratios | Difference between Sr ratio and human average Sr | Materials measured for Sr ratios | Reference                    |
|------------------|-----------------------------------------------|------------------|-----------------|----------------------|---------------------------------------------|-------------------------------------------|--------------------------------------------|------------------------|--------------------------------------|----------------------------|-----------------|--------------------------------------------------|----------------------------------|------------------------------|
| Vinogradnoe      | Eneolithic, Yamnaya, Early Catacomb, Catacomb | 0.7098           | 0.7098          | 0.0003               | 0.70951                                     | 0.71013                                   | 3 / 3                                      | 18.8                   | 16                                   | Cenozoic                   | 0.7076          | 0.0022                                           | rodent tooth (modern)            | Gerling 2015                 |
|                  |                                               |                  |                 |                      |                                             |                                           |                                            |                        |                                      |                            | 0.7119          | 0.0021                                           | shell (modern)                   | Gerling 2015                 |
|                  |                                               |                  |                 |                      |                                             |                                           |                                            |                        |                                      |                            | 0.7101          | 0.0003                                           | rodent tooth (modern)            | Gerling 2015                 |
|                  |                                               |                  |                 |                      |                                             |                                           |                                            |                        |                                      |                            | 0.7097          | 0.0001                                           | medieval dog tooth               | Gerling 2015                 |
|                  |                                               |                  |                 |                      |                                             |                                           |                                            |                        |                                      |                            | 0.7097          | 0.0001                                           | medieval dog tooth               | Gerling 2015                 |
| Peshtchanka      | Eneolithic, Yamnaya, Catacomb                 | 0.7103           | 0.7104          | 0.0008               | 0.70957                                     | 0.71118                                   | 1 / 1                                      | 14.3                   | 7                                    | Cenozoic                   | 0.7114          | 0.0011                                           | cattle 18th century              | Gerling 2015                 |
|                  |                                               |                  |                 |                      |                                             |                                           |                                            |                        |                                      |                            | 0.7116          | 0.0013                                           | cattle 18th century              | Gerling 2015                 |
|                  |                                               |                  |                 |                      |                                             |                                           |                                            |                        |                                      |                            | 0.7102          | 0.0001                                           | plant (modern)                   | Gerling 2015                 |
| Kirovograd       | Yamnaya, Catacomb                             | 0.7107           | 0.7107          | 0.0016               | 0.70912                                     | 0.71232                                   | 0 / 0                                      | 0.0                    | 8                                    | Cenozoic                   | 0.7104          | 0.0003                                           | horse tooth (ancient)            | Gerling 2015                 |
|                  |                                               |                  |                 |                      |                                             |                                           |                                            |                        |                                      |                            | 0.7104          | 0.0003                                           | horse tooth (ancient)            | Gerling 2015                 |
|                  |                                               |                  |                 |                      |                                             |                                           |                                            |                        |                                      |                            | 0.7103          | 0.0004                                           | horse tooth (ancient)            | Gerling 2015                 |
|                  |                                               |                  |                 |                      |                                             |                                           |                                            |                        |                                      |                            | 0.7104          | 0.0003                                           | horse tooth (ancient)            | Gerling 2015                 |
|                  |                                               |                  |                 |                      |                                             |                                           |                                            |                        |                                      |                            | 0.7103          | 0.0004                                           | horse tooth (ancient)            | Gerling 2015                 |
|                  |                                               |                  |                 |                      |                                             |                                           |                                            |                        |                                      |                            | 0.7102          | 0.0005                                           | snail (modern)                   | Gerling 2015                 |
| Shakhta Stepnaya | Yamnaya, Catacomb                             | 0.7099           | 0.7100          | 0.0001               | 0.70987                                     | 0.71005                                   | 1 / 1                                      | 25.0                   | 4                                    | Cenozoic                   | 0.7091          | 0.0008                                           | shell (ancient)                  | Gerling 2015                 |
|                  |                                               |                  |                 |                      |                                             |                                           |                                            |                        |                                      |                            | 0.7109          | 0.0010                                           | oak tree leaves                  | Gerling 2015                 |
| Nevskoe          | Catacomb                                      | 0.7091           | 0.7091          | 0.0004               | 0.70876                                     | 0.70948                                   | 0 / 0                                      | 0.0                    | 5                                    | Mesozoic                   |                 |                                                  |                                  | Gerling 2015                 |
| Alexandropol     | Iron Age/Scythian                             | 0.7099           | 0.7099          | 0.0006               | 0.70936                                     | 0.71047                                   | 0 / 0                                      | 0.0                    | 5                                    | Cenozoic                   | 0.7102          | 0.0003                                           | rodent tooth (modern)            | Gerling 2015                 |
| Babina Mogila    | Iron Age/Scythian                             | 0.7097           | 0.7097          | 0.0010               | 0.70876                                     | 0.71068                                   | 0 / 0                                      | 0.0                    | 2                                    | Cenozoic                   |                 |                                                  |                                  | Gerling 2015                 |
| Drana Kokhta     | Iron Age/Scythian                             | 0.7103           | 0.7103          | 0.0020               | 0.70834                                     | 0.71224                                   | 0 / 0                                      | 0.0                    | 2                                    | Cenozoic                   |                 |                                                  |                                  | Gerling 2015                 |
| Ordzhonikidze    | Iron Age/Scythian                             | 0.7100           | 0.7100          | 0.0003               | 0.70964                                     | 0.71026                                   | 0 / 0                                      | 0.0                    | 6                                    | Cenozoic                   | 0.7098          | 0.0002                                           | sheep bone (ancient)             | Gerling 2015                 |
| Zolotaya Balka   | Iron Age/Scythian                             | 0.7098           | 0.7099          | 0.0005               | 0.70945                                     | 0.71036                                   | 1 / 1                                      | 16.7                   | 6                                    | Cenozoic                   |                 |                                                  |                                  | Gerling 2015                 |
| Medvin           | Iron Age/Scythian                             | 0.7108           | 0.7108          | 0.0003               | 0.7104                                      | 0.7111                                    | 0 / 0                                      | 0.0                    | 9                                    | Cenozoic                   |                 |                                                  |                                  | This study                   |
| Mamai-Gora       | Iron Age/Scythian                             | 0.7100           | 0.7099          | 0.0003               | 0.7096                                      | 0.7103                                    | 4 / 2                                      | 15.4                   | 13                                   | Cenozoic                   |                 |                                                  |                                  | This study                   |
| Bel'sk           | Iron Age/Scythian                             | 0.7099           | 0.7102          | 0.0010               | 0.70920                                     | 0.71120                                   | 6 / 5                                      | 25.0                   | 20                                   | Cenozoic                   | 0.7102          | 0.0002                                           | rodent tooth                     | Ventresca Miller et al. 2019 |

S3 Table. Average strontium isotope ratios for all sites, with baseline values and outliers identified

| Site           | r    | r square | df | sample size | p-value |
|----------------|------|----------|----|-------------|---------|
| Medvin         | 0.45 | 0.20     | 10 | 12          | 0.1407  |
| Mamai-Gora     | 0.33 | 0.11     | 23 | 25          | 0.1083  |
| Bel'sk         | 0.41 | 0.17     | 32 | 34          | 0.0153  |
| Alexandropol   | 0.31 | 0.09     | 3  | 5           | 0.6143  |
| Babina Mogila  | -    | -        | -  | 2           | -       |
| Drana Kokhta   | -    | -        | -  | 2           | -       |
| Ordzhonikidze  | 0.28 | 0.08     | 4  | 6           | 0.5948  |
| Zolotaya Balka | 0.47 | 0.22     | 4  | 6           | 0.3482  |

\*

S4 Table. Linear Regression analysis of the relationship between strontium and carbon isotope values for Scythian era sites

| <b>Site</b> | <b>Sample Number</b> | <b>Laboratory Designation</b> | <b>Uncalibrated dates</b> | <b>Calibrated</b>     | <b>Notes</b>           |
|-------------|----------------------|-------------------------------|---------------------------|-----------------------|------------------------|
| Mamai-Gora  | Mamai-Gora 183       | Poz-93203                     | <b>2265 ± 30 BP</b>       | <b>399-209 cal BC</b> | 2,7%N 8,4%C, 11.3%coll |
| Mamai-Gora  | Mamai-Gora 212       | Poz-93205                     | <b>2195 ± 35 BP</b>       | <b>369-174 cal BC</b> | 3,4%N 10,1%C, 4.7%coll |
| Medvin      | Medvin 233           | Poz-93201                     | <b>2480 ± 35 BP</b>       | <b>775-431 cal BC</b> | 1%N 6,5%C, 5%coll      |
| Medvin      | Medvin 230           | Poz-93202                     | <b>2320 ± 35 BP</b>       | <b>484-233 cal BC</b> | 0,7%N 5,5%C, 5.4%coll  |

S5 Table. Radiocarbon dates of human remains from Mamai-Gora and Medvin

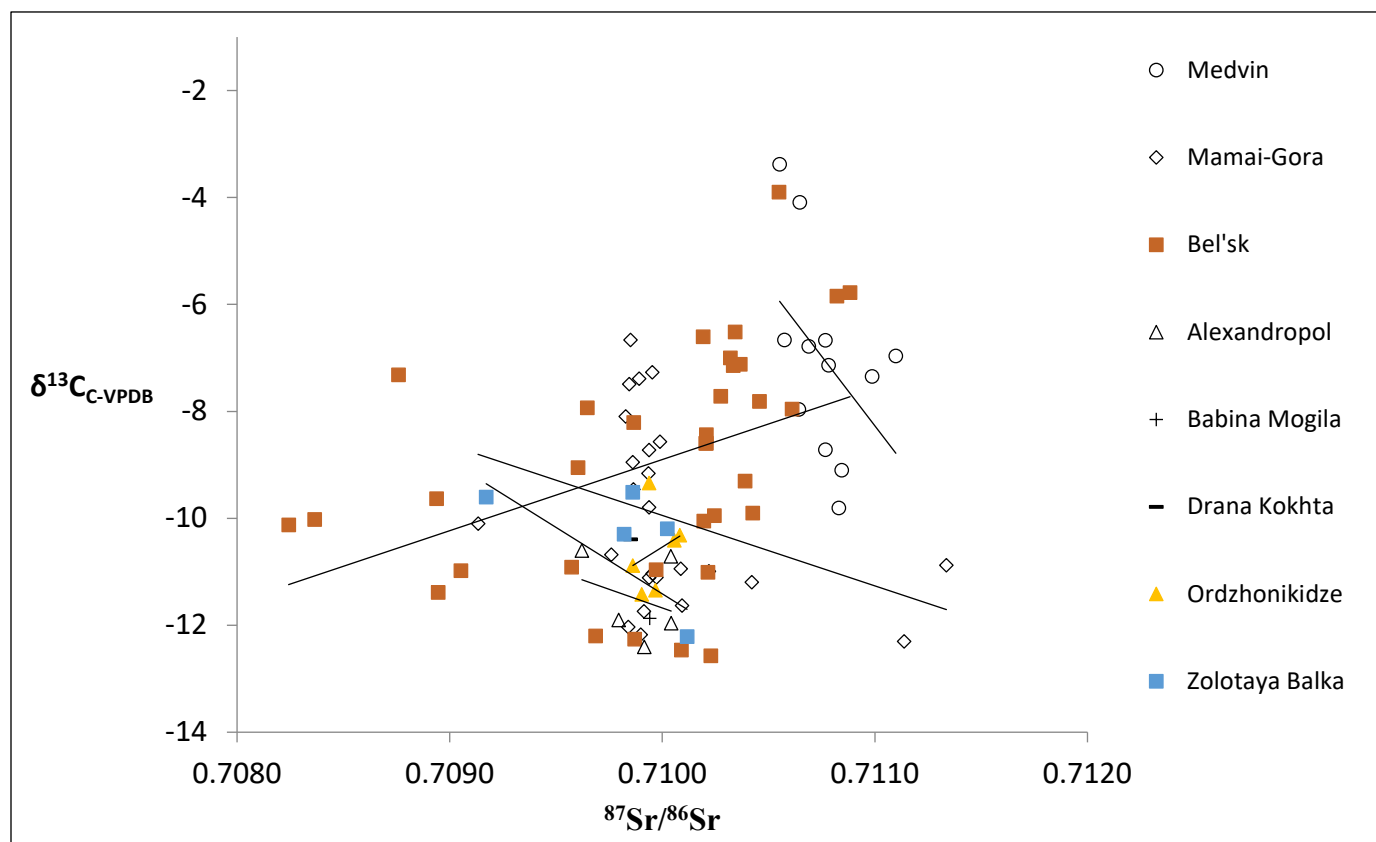

S1 Fig. Correlation of carbon and strontium isotope ratios at Scythian era sites
